# Supplementary material for: Regulation of cell survival by the HIP-55 signaling network
Source: Royal Society of Chemistry journal article supplement (doi:10.1039/c3mb70552h), 2014-03-11
Supplement: c3mb70552h1.pdf [file c3mb70552h1.pdf]

**Table S1. The Expression of Genes Involved In HIP-55-knockdown A549 Cells**

| Entrez Gene | Representative Public ID | Gene Symbol | Gene Title                                              | Fold change | Gene Ontology Biological Process                                           | Gene Ontology Cellular Component     | Gene Ontology Molecular Function                                            |
|-------------|--------------------------|-------------|---------------------------------------------------------|-------------|----------------------------------------------------------------------------|--------------------------------------|-----------------------------------------------------------------------------|
| 22858       | NM_173041                | ICK         | intestinal cell (MAK-like) kinase                       | 0.10        | protein amino acid phosphorylation                                         | nucleus, membrane-bounded organelle  | nucleotide binding, magnesium ion binding                                   |
| 123036      | NM_152332                | TC2N        | tandem C2 domains, nuclear                              | 0.21        |                                                                            | nucleus                              |                                                                             |
| 245972      | NM_152565                | ATP6V0D2    | ATPase, H+ transporting, lysosomal 38kDa, V0 subunit d2 | 4.08        | proton transport                                                           | proton-transporting domain           | hydrogen ion transmembrane transporter activity                             |
| 117157      | BC022407                 | SH2D1B      | SH2 domain containing 1B                                | 8.03        |                                                                            |                                      | protein binding                                                             |
| 7798        | NM_033631                | LUZP1       | leucine zipper protein 1                                | 28.88       |                                                                            | nucleus                              |                                                                             |
| 25914       | NM_173630                | RTTN        | rotatin                                                 | 4.51        | multicellular organismal development, determination of left/right symmetry |                                      | binding                                                                     |
| 26223       | NM_012159                | FBXL21      | F-box and leucine-rich repeat protein 21                | 4.28        | protein ubiquitination                                                     | ubiquitin ligase complex             | ubiquitin-protein ligase activity                                           |
| 130749      | NM_173077                | CPO         | carboxypeptidase O                                      | 0.17        | proteolysis                                                                | extracellular region                 | carboxypeptidase activity, metalloproteinase activity, hydrolase activity   |
| 148789      | NM_152490                | B3GALNT2    | beta-1,3-N-acetylgalactosaminyltransferase 2            | 3.56        | protein amino acid glycosylation                                           | Golgi apparatus, membrane            | galactosyltransferase activity                                              |
| 256356      | NM_152776                | GK5         | glycerol kinase 5 (putative)                            | 0.12        | carbohydrate metabolic process, glycerol metabolic process                 |                                      | glycerol kinase activity, ATP binding, transferase activity,                |
| 146057      | BC041876                 | TTBK2       | tau tubulin kinase 2                                    | 33.39       | cell death, peptidyl-serine phosphorylation                                | intermediate filament                | protein serine/threonine kinase activity, ATP binding, transferase activity |
| 51699       | BC032462                 | VPS29       | vacuolar protein sorting 29 homolog (S. cerevisiae)     | 0.29        | protein transport                                                          | cytoplasm, membrane                  | phosphoserine phosphatase activity, zinc ion binding                        |
| 717         | BC029781                 | C2          | complement component 2                                  | 0.10        | proteolysis, immune response                                               | extracellular region                 | serine-type endopeptidase activity, hydrolase activity                      |
| 346157      | BG722372                 | ZNF391      | zinc finger protein 391                                 | 32.52       | transcription                                                              | nucleus                              | DNA binding, zinc ion binding                                               |
| 1586        | AK094106                 | CYP17A1     |                                                         | 0.04        | C-steroid hormone biosynthetic process                                     | mitochondrion, endoplasmic reticulum | steroid -alpha-monooxygenase activity                                       |

| Entrez Gene | Representative Public ID | Gene Symbol | Gene Title                                                                                                    | Fold change | Gene Ontology Biological Process                         | Gene Ontology Cellular Component            | Gene Ontology Molecular Function                                                                 |
|-------------|--------------------------|-------------|---------------------------------------------------------------------------------------------------------------|-------------|----------------------------------------------------------|---------------------------------------------|--------------------------------------------------------------------------------------------------|
| 149461      | BC030524                 | CLDN19      | claudin 19                                                                                                    | 0.21        | visual perception,calcium-independent cell-cell adhesion | tight junction                              | magnesium ion binding                                                                            |
| 8418        | BC022302                 | CMAH        | cytidine monophosphate-N-acetylneuraminic acid hydroxylase (CMP-N-acetylneuraminate monooxygenase) pseudogene | 0.11        | oxidation reduction                                      | cytoplasm                                   | electron carrier activity,oxidoreductase activity,CMP-N-acetylneuraminate monooxygenase activity |
| 57565       | BC021267                 | KLHL14      | kelch-like 14 (Drosophila)                                                                                    | 48.50       |                                                          |                                             | protein binding                                                                                  |
| 5743        | AY151286                 | PTGS2       | prostaglandin-endoperoxide synthase 2 (prostaglandin G/H synthase and cyclooxygenase)                         | 0.32        | cell motion, regulation of blood pressure                | nucleus,endoplasmic reticulum,microsome     | peroxidase activity,heme binding                                                                 |
| 144406      | BC036233                 | WDR66       | WD repeat domain 66                                                                                           | 12.28       |                                                          |                                             |                                                                                                  |
| 27133       | BC043409                 | KCNH5       | potassium voltage-gated channel                                                                               | 31.80       | phosphorelay,rtranscription,,signal transduction         | membrane                                    | potassium channel activity                                                                       |
| 283933      | BC036762                 | ZNF843      | zinc finger protein 843                                                                                       | 5.79        |                                                          | intracellular                               | nucleic acid binding,zinc ion binding                                                            |
| 5737        | BC035694                 | PTGFR       | prostaglandin F receptor (FP)                                                                                 | 3.59        | parturition                                              | plasma membrane                             | prostaglandin F receptor activity                                                                |
| 23545       | BC0223,                  | ATP6V0A2    | lysosomal V0 subunit a2                                                                                       | 3.88        | immune response, proton transport                        | acrosomal vesicle,endosome,plasma membrane  | protein binding,hydrogen ion transmembrane transporter activity                                  |
| 57728       | BC032578                 | WDR19       | WD repeat domain 19                                                                                           | 0.29        | vesicle-mediated transport                               |                                             | protein binding                                                                                  |
| 8243        | BC046147                 | SMC1A       | structural maintenance of chromosomes 1A                                                                      | 14.38       | cell cycle ,nuclear mRNA splicing,DNA repair             | condensed chromosome kinetochore,cytoplasm, | chromatin binding,microtubule motor activity                                                     |
| 64344       | AK021881                 | HIF3A       | hypoxia inducible factor 3                                                                                    | 0.30        | regulation of transcription                              | nucleus,cytoplasm                           | DNA binding,signal transducer activity                                                           |

| Entrez Gene | Representative Public ID | Gene Symbol | Gene Title                                                                                             | Fold change | Gene Ontology Biological Process                                   | Gene Ontology Cellular Component                               | Gene Ontology Molecular Function                         |
|-------------|--------------------------|-------------|--------------------------------------------------------------------------------------------------------|-------------|--------------------------------------------------------------------|----------------------------------------------------------------|----------------------------------------------------------|
| 1974        | BC039344                 | EIF4A2      | eukaryotic translation initiation factor 4A, isoform 2                                                 | 0.27        | translation,interspecies interaction between organisms             | eukaryotic translation initiation factor 4F complex            | translation initiation factor activity,helicase activity |
| 5081        | AI250939                 | PAX7        | paired box 7                                                                                           | 0.30        | transcription, anti-apoptosis,multicellular organismal development | nucleus                                                        | transcription factor activity                            |
| 1915        | BE622780                 | EEF1A1      | Eukaryotic translation elongation factor 1 alpha 1                                                     | 4.67        | translational elongation                                           | eukaryotic translation elongation factor 1 complex             | translation elongation factor activity,GTPase activity   |
| 5337        | AK091897                 | PLD1        | phospholipase D1, phosphatidylcholine-specific                                                         | 0.03        | Ras protein signal transduction,lipid catabolic process            | Golgi membrane,cytoplasm                                       | phospholipase D activity                                 |
| 57498       | AA992480                 | KIDINS220   | kinase D-interacting substrate, 220kDa                                                                 | 0.16        | intracellular signaling cascade                                    | cytosol ,membrane                                              | kinase activity                                          |
| 2335        | W73431                   | FN1         | fibronectin 1                                                                                          | 3.50        | acute-phase response,cell adhesion                                 | extracellular region,fibrinogen complex,apical plasma membrane | collagen binding,peptidase activator activity            |
| 8091        | AI990940                 | HMGA2       | high mobility group AT-hook 2                                                                          | 0.21        | regulation of transcription, cell cycle,                           | chromosome                                                     | DNA binding,protein binding                              |
| 1729        | AL832054                 | DIAPH1      | diaphanous homolog 1 (Drosophila)                                                                      | 3.37        | sensory perception of sound,actin cytoskeleton organization        | cytoskeleton                                                   | actin binding,receptor binding,Rho GTPase binding        |
| 29880       | BG94,96                  | ALG5        | Asparagine-linked glycosylation 5, dolichyl-phosphate beta-glucosyltransferase homolog (S. cerevisiae) | 0.30        | protein glycosylation, determination of left/right symmetry        | endoplasmic reticulum membrane                                 | oligosaccharyl transferase activity                      |
| 6546        | Y12885                   | SLC8A1      | solute carrier family 8 (sodium/calcium exchanger), member 1                                           | 3.21        | Heart contraction, regulation of ion transport                     | plasma membraneT-tubule,sarcolemma                             | calcium:sodium antiporter activity                       |
| 8874        | AL831814                 | ARHGEF7     | Rho guanine nucleotide exchange factor (GEF) 7                                                         | 4.18        | regulation of Rho protein signal transduction                      | nucleolus,cytosol                                              | Rho guanyl-nucleotide exchange factor activity           |
| 1262        | BC040277                 | CNGA4       | cyclic nucleotide gated channel alpha 4                                                                | 0.14        | ion transport,sensory perception of smell                          | membrane                                                       | nucleotide binding,ion channel activity,cAMP binding     |
| 163051      | BI830259                 | ZNF709      | zinc finger protein 709                                                                                | 4.92        | transcription                                                      | nucleus                                                        | DNA binding,zinc ion binding                             |

| Entrez Gene | Representative Public ID | Gene Symbol | Gene Title                                                                                    | Fold change | Gene Ontology Biological Process                                                 | Gene Ontology Cellular Component                 | Gene Ontology Molecular Function                                                                                             |
|-------------|--------------------------|-------------|-----------------------------------------------------------------------------------------------|-------------|----------------------------------------------------------------------------------|--------------------------------------------------|------------------------------------------------------------------------------------------------------------------------------|
| 162998      | AK095468                 | OR7D2       | olfactory receptor, family 7, subfamily D, member 2                                           | 5.79        | sensory perception of smell                                                      | plasma membrane                                  | olfactory receptor activity                                                                                                  |
| 5166        | AL832708                 | PDK4        | pyruvate dehydrogenase kinase, isozyme 4                                                      | 0.15        | glucose metabolic process,signal transduction,peptidyl-histidine phosphorylation | mitochondrial                                    | two-component sensor activity,protein histidine kinase activity,pyruvate dehydrogenase (acetyl-transferring) kinase activity |
| 25862       | AL049937                 | USP49       | ubiquitin specific peptidase 49                                                               | 21.64       | ubiquitin-dependent protein catabolic process                                    |                                                  | ubiquitin thiolesterase activity,zinc ion binding                                                                            |
| 55191       | BF,1535                  | NADSYN1     | NAD synthetase 1                                                                              | 0.09        | nitrogen compound metabolic process                                              | cytosol                                          | NAD+ synthase (glutamine-hydrolyzing) activity                                                                               |
| 5054        | BC020765                 | SERPINE1    | serpin peptidase inhibitor, clade E (nexin, plasminogen activator inhibitor type 1), member 1 | 4.46        | chronological cell aging,blood coagulation,angiogenesis                          | extracellular region,plasma membrane             | serine-type endopeptidase inhibitor activity                                                                                 |
| 11320       | BC031487                 | MGAT4A      | Mannosyl (alpha-1,3-)-glycoprotein beta-1,4-N-acetylglucosaminyltransferase, isozyme A        | 3.07        | carbohydrate metabolic process,9N-glycan processing                              | extracellular region,Golgi apparatus,membrane    | transferring glycosyl groups                                                                                                 |
| 81931       | BC020837                 | ZNF93       | zinc finger protein 93                                                                        | 0.08        | transcription                                                                    | nucleus                                          | transcription factor activity,zinc ion binding                                                                               |
| 9970        | BC030972                 | NR113       | nuclear receptor subfamily 1, group I, member 3                                               | 9.67        | transcription                                                                    | nucleus                                          | transcription factor activity,steroid hormone receptor activity                                                              |
| 3987        | BC015843                 | LIMS1       | LIM and senescent cell antigen-like domains 1                                                 | 15.36       | cell aging                                                                       | plasma membrane,focal adhesion                   | protein binding,zinc ion binding                                                                                             |
| 472         | BG623786                 | ATM         | ataxia telangiectasia mutated                                                                 | 0.04        | DNA repair,female gamete generation,brain development                            | nucleus,nucleoplasm ,spindle,cytoplasmic vesicle | DNA binding,protein serine/threonine kinase activity                                                                         |
| 473         | AI920976                 | RERE        | arginine-glutamic acid dipeptide (RE) repeats                                                 | 14.14       | transcription,multicellular organismal development                               | nucleus                                          | transcription factor activity,protein binding,zinc ion binding                                                               |
| 3728        | NM_021991                | JUP         | junction plakoglobin                                                                          | 0.29        | cell adhesion                                                                    | cytoplasm,cytoplasm                              | cytoskeletal protein binding                                                                                                 |
| 999         | NM_04360                 | CDH1        | cadherin 1, type 1, E-cadherin (epithelial)                                                   | 0.27        | cell adhesion,regulation of caspase activity                                     | Golgi apparatus,plasma membrane                  | calcium ion binding                                                                                                          |

| Entrez Gene | Representative Public ID | Gene Symbol | Gene Title                                                                    | Fold change | Gene Ontology Biological Process                                          | Gene Ontology Cellular Component            | Gene Ontology Molecular Function                                                   |
|-------------|--------------------------|-------------|-------------------------------------------------------------------------------|-------------|---------------------------------------------------------------------------|---------------------------------------------|------------------------------------------------------------------------------------|
| 3490        | NM_,1553                 | IGFBP7      | insulin-like growth factor binding protein 7                                  | 3.65        | cell adhesion,negative regulation of cell proliferation                   | extracellular region                        | insulin-like growth factor binding                                                 |
| 6414        | NM_,5410                 | SEPP1       | selenoprotein P, plasma, 1                                                    | 0.09        | selenium metabolic process,response to oxidative stress,brain development | extracellular region                        | selenium binding                                                                   |
| 6426        | M69040                   | SFRS1       | splicing factor, arginine/serine-rich 1                                       | 7.78        | RNA splicing                                                              | nucleus,spliceosome                         | RNA binding                                                                        |
| 4811        | BF94,43                  | NID1        | nidogen 1                                                                     | 4.12        | cell adhesion                                                             | extracellular region,basement membrane      | calcium ion binding                                                                |
| 7102        | NM_,4615                 | TSPAN7      | tetraspanin 7                                                                 | 4.12        | protein amino acid N-linked glycosylation                                 | extracellular region,plasma membrane        | calcium ion binding                                                                |
| 1277        | NM_,088                  | COL1A1      | collagen, type I, alpha 1                                                     | 0.31        | skeletal system development, ossification,blood vessel development        | extracellular regionn,collagen type I       | extracellular matrix structural constituent,platelet-derived growth factor binding |
| 6695        | AF231124                 | SPOCK1      | sparc/osteonectin, cwcv and kazal-like domains proteoglycan (testican) 1      | 3.68        | cell motion,cell adhesion,signal transduction                             | extracellular matrix                        | calcium ion binding                                                                |
| 28951       | NM_021643                | TRIB2       | tribbles homolog 2 (Drosophila)                                               | 0.24        | protein amino acid phosphorylation,regulation of MAP kinase activity      | nucleus,cytoplasm,cytoskeleton              | nucleotide binding,protein kinase inhibitor activity                               |
| 3709        | AI963873                 | ITPR2       | inositol 1,4,5-triphosphate receptor, type 2                                  | 0.32        | response to hypoxia,ion transport,calcium ion transport                   | endoplasmic reticulum                       | receptor activity,ion channel activity,                                            |
| 8743        | U57059                   | TNFSF10     | tumor necrosis factor (ligand) superfamily, member 10                         | 0.16        | apoptosis                                                                 | extracellular region                        | receptor binding,cytokine activitytumor necrosis factor receptor binding           |
| 6507        | NM_,4172                 | SLC1A3      | solute carrier family 1 (glial high affinity glutamate transporter), member 3 | 0.05        | neurotransmitter uptake                                                   | plasma membrane                             | high-affinity glutamate transmembrane transporter activity                         |
| 290         | NM_,1150                 | ANPEP       | alanyl (membrane) aminopeptidase                                              | 11.58       | angiogenesis,proteolysis                                                  | cytoplasm,ER-Golgi intermediate compartment | aminopeptidase activity,receptor activity                                          |
| 4646        | AA877789                 | MYO6        | myosin VI                                                                     | 0.29        | protein transport,endocytosis                                             | ruffle,nucleus,cytoplasm                    | nucleotide binding,motor activity                                                  |

| Entrez Gene | Representative Public ID | Gene Symbol | Gene Title                                                                    | Fold change | Gene Ontology Biological Process                                                           | Gene Ontology Cellular Component | Gene Ontology Molecular Function                           |
|-------------|--------------------------|-------------|-------------------------------------------------------------------------------|-------------|--------------------------------------------------------------------------------------------|----------------------------------|------------------------------------------------------------|
| 6337        | NM_,1038                 | SCNN1A      | sodium channel, nonvoltage-gated 1 alpha                                      | 0.27        | ion transport,excretion                                                                    | plasma membrane                  | actin binding,ion channel activity,sodium channel activity |
| 2487        | U91903                   | FRZB        | frizzled-related protein                                                      | 4.93        | multicellular organismal development,negative regulation of Wnt receptor signaling pathway | extracellular region             | Wnt-protein binding                                        |
| 3109        | NM_,2118                 | HLA-DMB     | major histocompatibility complex, class II, DM beta                           | 0.22        | antigen processing and presentation                                                        | lysosome,plasma membrane         | nucleotide binding                                         |
| 9923        | AI557467                 | ZBTB40      | zinc finger and BTB domain containing 40                                      | 3.96        | transcription                                                                              | nucleus                          | DNA binding,zinc ion binding                               |
| 607         | NM_,4326                 | BCL9        | B-cell CLL/lymphoma 9                                                         | 5.36        | Wnt receptor signaling pathway                                                             | nucleus                          | protein binding                                            |
| 4316        | NM_,2423                 | MMP7        | matrix metalloproteinase 7 (matrilysin, uterine)                              | 0.25        | proteolysis                                                                                | extracellular region             | metalloendopeptidase activity                              |
| 4015        | NM_,2317                 | LOX         | lysyl oxidase                                                                 | 3.44        | blood vessel development,lung development                                                  | extracellular region             | protein-lysine 6-oxidase activity                          |
| 9730        | NM_014703                | VPRBP       | Vpr (HIV-1) binding protein                                                   | 3.26        | modification-dependent protein catabolic process                                           | cytoplasm                        | binding                                                    |
| 4128        | NM_,240                  | MAOA        | monoamine oxidase A                                                           | 0.30        | catecholamine metabolic process,behavior                                                   | mitochondrion                    | amine oxidase activity,electron carrier activity           |
| 240         | NM_,698                  | ALOX5       | arachidonate 5-lipoxygenase                                                   | 0.29        | leukotriene metabolic process                                                              | nucleus,cytoplasm,membrane       | arachidonate 5-lipoxygenase activity,calcium ion binding   |
| 6622        | NM_,345                  | SNCA        | synuclein, alpha (non A4 component of amyloid precursor)                      | 0.18        | anti-apoptosis                                                                             | nucleus,cytoplasm                | protein binding                                            |
| 4312        | NM_,2421                 | MMP1        | matrix metalloproteinase 1 (interstitial collagenase)                         | 0.25        | proteolysis                                                                                | extracellular region             | metalloendopeptidase activity,zinc ion binding             |
| 7020        | NM_,3220                 | TFAP2A      | transcription factor AP-2 alpha (activating enhancer binding protein 2 alpha) | 0.10        | regulation of transcription                                                                | nucleus                          | transcription factor activity                              |

| Entrez Gene | Representative Public ID | Gene Symbol | Gene Title                                                   | Fold change | Gene Ontology Biological Process                                                                         | Gene Ontology Cellular Component                              | Gene Ontology Molecular Function                                |
|-------------|--------------------------|-------------|--------------------------------------------------------------|-------------|----------------------------------------------------------------------------------------------------------|---------------------------------------------------------------|-----------------------------------------------------------------|
| 3384        | NM_,873                  | ICAM2       | intercellular adhesion molecule 2                            | 0.27        | cell adhesion                                                                                            | plasma membrane                                               | integrin binding                                                |
| 2244        | NM_,5141                 | FGB         | fibrinogen beta chain                                        | 0.19        | signal transduction,platelet activation                                                                  | extracellular region,platelet alpha granule                   | eukaryotic cell surface binding                                 |
| 11216       | NM_,7202                 | AKAP10      | A kinase (PRKA) anchor protein 10                            | 0.21        | signal transduction                                                                                      | cytoplasm,mitochondrion                                       | signal transducer activity                                      |
| 316         | NM_,1159                 | AOX1        | aldehyde oxidase 1                                           | 3.04        | oxygen and reactive oxygen species metabolic process                                                     | cytoplasm                                                     | aldehyde oxidase activity,electron carrier activity             |
| 3569        | NM_,6,                   | IL6         | interleukin 6 (interferon, beta 2)                           | 3.14        | neutrophil apoptosis,positive regulation of MAPKKK cascade                                               | extracellular region                                          | interleukin-6 receptor binding                                  |
| 350         | NM_,042                  | APOH        | apolipoprotein H (beta-2-glycoprotein I)                     | 0.32        | negative regulation of endothelial cell proliferation,positive regulation of lipoprotein lipase activity | extracellular region,intracellular membrane-bounded organelle | lipoprotein lipase activator activity                           |
| 4306        | NM_,901                  | NR3C2       | nuclear receptor subfamily 3, group C, member 2              | 0.21        | transcription,excretion                                                                                  | nucleus,cytoplasm,endoplasmic reticulum                       | transcription factor activity,steroid hormone receptor activity |
| 5450        | NM_,6235                 | POU2AF1     | POU class 2 associating factor 1                             | 13.26       | transcription,humoral immune response                                                                    | nucleus                                                       | transcription cofactor activity                                 |
| 3764        | BF514158                 | KCNJ8       | potassium inwardly-rectifying channel, subfamily J, member 8 | 7.86        | kidney developmenttransport,ion transport,defense response to virus                                      | mitochondrion,membrane                                        | inward rectifier potassium channel activity                     |
| 5324        | NM_,2655                 | PLAG1       | pleiomorphic adenoma gene 1                                  | 9.31        | regulation of transcription                                                                              | nucleus                                                       | transcription factor activity,zinc ion binding                  |
| 286         | M28880                   | ANK1        | ankyrin 1, erythrocytic                                      | 0.05        | exocytosis,cytoskeleton organization                                                                     | cytoskeleton,plasma membrane                                  | structural molecule activity,cytoskeletal adaptor activity      |
| 6876        | NM_,3186                 | TAGLN       | transgelin                                                   | 3.31        | muscle organ development                                                                                 | cytoplasm                                                     | actin binding                                                   |
| 4488        | D31771                   | MSX2        | msh homeobox 2                                               | 0.24        | skeletal system development,regulation of transcription                                                  | nucleus                                                       | transcription factor activity                                   |
| 27074       | NM_014398                | LAMP3       | lysosomal-associated membrane protein 3                      | 0.19        | cell proliferation                                                                                       | lysosome                                                      |                                                                 |
| 7425        | NM_,3378                 | VGF         | VGF nerve growth factor inducible                            | 3.40        | ovarian follicle development                                                                             | extracellular space                                           | neuropeptide hormone activity                                   |

| Entrez Gene | Representative Public ID | Gene Symbol | Gene Title                                                                                               | Fold change | Gene Ontology Biological Process                                                 | Gene Ontology Cellular Component                    | Gene Ontology Molecular Function                                                        |
|-------------|--------------------------|-------------|----------------------------------------------------------------------------------------------------------|-------------|----------------------------------------------------------------------------------|-----------------------------------------------------|-----------------------------------------------------------------------------------------|
| 5152        | NM_,2606                 | PDE9A       | phosphodiesterase 9A                                                                                     | 0.16        | signal transduction                                                              | cytosol                                             | 5'-cyclic-nucleotide phosphodiesterase activity                                         |
| 8997        | NM_,3947                 | KALRN       | kalirin, RhoGEF kinase                                                                                   | 4.07        | protein amino acid phosphorylation,regulation of Rho protein signal transduction | cytoplasm,cytoskeleton                              | protein serine/threonine kinase activity,Rho guanyl-nucleotide exchange factor activity |
| 2243        | NM_,508                  | FGA         | fibrinogen alpha chain                                                                                   | 0.23        | platelet activation,tissue regeneration                                          | ,extracellular region ,platelet alpha granule lumen | eukaryotic cell surface binding                                                         |
| 7306        | NM_,550                  | TYRP1       | tyrosinase-related protein 1                                                                             | 3.90        | melanin biosynthetic process from tyrosine,pigmentation                          | nucleus,cytoplasm,plasma membrane                   | monooxygenase activity,copper ion binding                                               |
| 1040        | NM_,1263                 | CDS1        | CDP-diacylglycerol synthase (phosphatidate cytidyltransferase) 1                                         | 0.14        | lipid metabolic process                                                          | endoplasmic reticulum                               | diacylglycerol cholinephosphotransferase activity                                       |
| 8631        | NM_,3726                 | SKAP1       | src kinase associated phosphoprotein 1                                                                   | 0.26        | immune response                                                                  | nucleus,cytoplasm,membrane                          | SH3/SH2 adaptor activity                                                                |
| 1551        | NM_,765                  | CYP3A7      | cytochrome P450, family 3, subfamily A, polypeptide 7                                                    | 0.11        | oxidation reduction                                                              | endoplasmic reticulum,membrane                      | monooxygenase activity                                                                  |
| 7474        | NM_,3392                 | WNT5A       | wingless-type MMTV integration site family, member 5A                                                    | 0.31        | Wnt receptor signaling pathway, calcium modulating pathway,JNK cascade           | extracellular region                                | signal transducer activity                                                              |
| 7644        | NM_,3430                 | ZNF91       | zinc finger protein 91                                                                                   | 44.98       | regulation of transcription                                                      | intracellular,nucleus                               | transcription factor activity,zinc ion binding                                          |
| 1491        | NM_,1902                 | CTH         | cystathionase (cystathionine gamma-lyase)                                                                | 0.27        | cysteine metabolic process,negative regulation of cell growth                    | cytoplasm                                           | catalytic activity                                                                      |
| 54575       | NM_,1072                 | UGT1A1      | UDP glucuronosyl transferase 1 family, polypeptide A1 / glucuronosyltransferase 1 family, polypeptide A9 | 7.49        | xenobiotic metabolic process                                                     | endoplasmic reticulum,integral to membrane          | ,UDP-glycosyltransferase activity                                                       |
| 6036        | NM_,2934                 | RNASE2      | ribonuclease, RNase A family, 2 (liver, eosinophil-derived neurotoxin)                                   | 0.03        | RNA catabolic process,chemotaxis                                                 | extracellular region,lysosome                       | ribonuclease activity, hydrolase activity                                               |



| Entrez Gene | Representative Public ID | Gene Symbol | Gene Title                                                                          | Fold change | Gene Ontology Biological Process                                                 | Gene Ontology Cellular Component         | Gene Ontology Molecular Function                                                              |
|-------------|--------------------------|-------------|-------------------------------------------------------------------------------------|-------------|----------------------------------------------------------------------------------|------------------------------------------|-----------------------------------------------------------------------------------------------|
| 6,5         | AF178841                 | RHAG        | Rh-associated glycoprotein                                                          | 3.31        | cellular ion homeostasis,blood circulation                                       | plasma membrane                          | ammonium transmembrane transporter activity,ankyrin binding                                   |
| 140         | NM_,677                  | ADORA3      | adenosine A3 receptor                                                               | 22.89       | inflammatory response, regulation of heart contraction                           | plasma membrane                          | adenosine receptor activity                                                                   |
| 762         | NM_,717                  | CA4         | carbonic anhydrase IV                                                               | 0.12        | one-carbon compound metabolic process,visual perception                          | membrane fraction,plasma membrane        | carbonate dehydratase activity                                                                |
| 552         | NM_,706                  | AVPR1A      | arginine vasopressin receptor 1A                                                    | 0.15        | regulation of systemic arterial blood pressure by vasopressin                    | plasma membrane                          | protein kinase C binding, V1A vasopressin receptor binding                                    |
| 4922        | NM_,6183                 | NTS         | neurotensin                                                                         | 0.10        | regulation of blood vessel size                                                  | extracellular region,cytoplasmic vesicle | neuropeptide hormone activity                                                                 |
| 5319        | NM_,928                  | PLA2G1B     | phospholipase A2, group IB (pancreas)                                               | 0.04        | activation of MAPK activity,neutrophil mediated immunity                         | extracellular region                     | phospholipase A2 activity,                                                                    |
| 866         | NM_,1756                 | SERPINA6    | serpin peptidase inhibitor, clade A (alpha-1 antiproteinase, antitrypsin), member 6 | 0.26        | glucocorticoid metabolic process                                                 | extracellular region                     | serine-type endopeptidase inhibitor activity,steroid binding                                  |
| 1013        | NM_,4933                 | CDH15       | cadherin 15, type 1, M-cadherin (myotubule)                                         | 7.64        | cell adhesion                                                                    | plasma membrane,membrane                 | calcium ion binding                                                                           |
| 9971        | NM_,5123                 | NR1H4       | nuclear receptor subfamily 1, group H, member 4                                     | 0.21        | negative regulation of transcription from RNA polymerase II promoter             | nucleus                                  | transcription factor activity,transcription factor activity,steroid hormone receptor activity |
| 9021        | NM_,3955                 | SOCS3       | suppressor of cytokine signaling 3                                                  | 0.13        | regulation of protein amino acid phosphorylation,anti-apoptosis,JAK-STAT cascade |                                          | protein kinase inhibitor activity                                                             |
| 288         | NM_020987                | ANK3        | ankyrin 3, node of Ranvier (ankyrin G)                                              | 0.19        | cytoskeletal anchoring at plasma membrane                                        | endoplasmic reticulum,Golgi apparatus    | protein C-terminus binding                                                                    |
| 7092        | AI769310                 | TLL1        | tolloid-like 1                                                                      | 0.26        | cell differentiation                                                             | extracellular region                     | metalloendopeptidase activity                                                                 |
| 1259        | NM_,087                  | CNGA1       | cyclic nucleotide gated channel alpha 1                                             | 0.18        | ion transport,immune response                                                    | photoreceptor outer segmen               | cGMP binding                                                                                  |

| Entrez Gene | Representative Public ID | Gene Symbol | Gene Title                                                                                        | Fold change | Gene Ontology Biological Process                                              | Gene Ontology Cellular Component | Gene Ontology Molecular Function                        |
|-------------|--------------------------|-------------|---------------------------------------------------------------------------------------------------|-------------|-------------------------------------------------------------------------------|----------------------------------|---------------------------------------------------------|
| 10202       | NM_,5794                 | DHRS2       | dehydrogenase/reductase (SDR family) member 2                                                     | 0.08        | C-steroid hormone metabolic process,negative regulation of cell proliferation | nucleus,cytoplasm                | carbonyl reductase (NADPH) activity                     |
| 6595        | NM_,3070                 | SMARCA2     | SWI/SNF related, matrix associated, actin dependent regulator of chromatin, subfamily a, member 2 | 0.07        | regulation of transcription                                                   | nucleus                          | DNA binding                                             |
| 3641        | NM_,2195                 | INSL4       | insulin-like 4 (placenta)                                                                         | 0.29        | signal transduction                                                           | extracellular region             | insulin-like growth factor receptor binding             |
| 786         | NM_,727                  | CACNG1      | calcium channel, voltage-dependent, gamma subunit 1                                               | 26.69       | calcium ion transport                                                         | calcium channel complex          | ion channel activity                                    |
| 9534        | NM_,4876                 | ZNF254      | zinc finger protein 254                                                                           | 0.12        | negative regulation of transcription                                          | nucleus                          | DNA binding                                             |
| 8739        | NM_,3806                 | HRK         | harakiri, BCL2 interacting protein (contains only BH3 domain)                                     | 3.12        | apoptosis                                                                     |                                  | protein binding                                         |
| 5465        | NM_,5036                 | PPARA       | peroxisome proliferator-activated receptor alpha                                                  | 0.12        | hypoxia transcription                                                         | nucleus                          | DNA binding                                             |
| 6299        | NM_,2968                 | SALL1       | sal-like 1 (Drosophila)                                                                           | 0.16        | transcription                                                                 | nucleus                          | DNA binding                                             |
| 8744        | NM_,3811                 | TNFSF9      | tumor necrosis factor (ligand) superfamily, member 9                                              | 0.26        | apoptosis,immune response                                                     | extracellular space,membrane     | cytokine activitytumor necrosis factor receptor binding |
| 8366        | NM_,3545                 | HIST1H4B    | Histone cluster 1, H4b                                                                            | 3.56        | nucleosome assembly                                                           | nucleosome                       | DNA binding                                             |
| 1235        | NM_,4367                 | CCR6        | chemokine (C-C motif) receptor 6                                                                  | 0.05        | immune response, signal transduction                                          | membrane                         | receptor activity                                       |
| 6538        | NM_014229                | SLC6A11     | solute carrier family 6 (neurotransmitter transporter, GABA), member 11                           | 9.02        | neurotransmitter transport                                                    | membrane                         | neurotransmitter                                        |
| 3760        | NM_,2239                 | KCNJ3       | potassium inwardly-rectifying channel, subfamily J, member 3                                      | 22.87       | potassium ion transport                                                       | potassium channel complex        | inward rectifier potassium channel activity             |

| Entrez Gene | Representative Public ID | Gene Symbol | Gene Title                                                      | Fold change | Gene Ontology Biological Process                                       | Gene Ontology Cellular Component | Gene Ontology Molecular Function                                    |
|-------------|--------------------------|-------------|-----------------------------------------------------------------|-------------|------------------------------------------------------------------------|----------------------------------|---------------------------------------------------------------------|
| 23373       | NM_025021                | CRTC1       | CREB regulated transcription coactivator 1                      | 9.41        | transcription                                                          | nucleus,cytoplasm                | transcription coactivator                                           |
| 941         | NM_,5191                 | CD80        | CD80 molecule                                                   | 3.94        | intracellular signaling cascade                                        | membrane                         | transcription activator activity                                    |
| 242         | NM_,1139                 | ALOX12B     | arachidonate 12-lipoxygenase, 12R type                          | 0.19        | leukotriene metabolic proces                                           |                                  | arachidonate -lipoxygenase activity                                 |
| 9420        | NM_,4820                 | CYP7B1      | cytochrome P450, family 7, subfamily B, polypeptide 1 UDP       | 4.49        | bile acid biosynthetic process                                         | endoplasmic reticulum            | oxysterol 7-alpha-hydroxylase activity                              |
| 7366        | NM_,1076                 | UGT2B15     | glucuronosyltransferase 2 family, polypeptide B15               | 0.16        | steroid metabolic process                                              | endoplasmic reticulum            | glucuronosyltransferase activity                                    |
| 3354        | NM_,865                  | HTR1E       | 5-hydroxytryptamine (serotonin) receptor 1E                     | 3.22        | signal transduction                                                    | membrane                         | serotonin receptor activity                                         |
| 7355        | NM_,5660                 | SLC35A2     | solute carrier family 35 (UDP-galactose transporter), member A2 | 0.26        | UDP-galactose transport                                                | Golgi membrane                   | UDP-galactose transmembrane transporter activity                    |
| 130         | NM_,672                  | ADH6        | alcohol dehydrogenase 6 (class V)                               | 0.29        | ethanol oxidation                                                      | cytosol                          | alcohol dehydrogenase activity                                      |
| 4868        | NM_,4646                 | NPHS1       | nephrosis 1, congenital, Finnish type (nephrin)                 | 0.23        | MAPKKK cascade,JNK cascade,excretion                                   | membrane                         | protein binding                                                     |
| 1142        | NM_,749                  | CHRNA3      | cholinergic receptor, nicotinic, beta 3                         | 0.26        | transport                                                              | membrane                         | nicotinic acetylcholine-activated cation-selective channel activity |
| 6332        | NM_,2976                 | SCN7A       | sodium channel, voltage-gated, type VII, alpha                  | 25.87       | sodium ion transport,muscle contraction                                | sodium channel complex,nucleus   | sodium channel activity                                             |
| 5078        | NM_,6193                 | PAX4        | paired box 4                                                    | 17.70       | multicellular organismal development                                   | nucleus,cytoplasm                | transcription regulator activity                                    |
| 5579        | NM_,2738                 | PRKCB       | protein kinase C, beta                                          | 0.18        | phosphorylation,calcium ion transport,cellular calcium ion homeostasis | nucleus,cytoplasm                | nucleotide binding,protein kinase C activity                        |
| 6354        | NM_,6273                 | CCL7        | chemokine (C-C motif) ligand 7                                  | 7.97        | inflammatory response,immune response                                  | extracellular region             | cytokine activity                                                   |

| Entrez Gene | Representative Public ID | Gene Symbol | Gene Title                                                                       | Fold change | Gene Ontology Biological Process          | Gene Ontology Cellular Component     | Gene Ontology Molecular Function         |
|-------------|--------------------------|-------------|----------------------------------------------------------------------------------|-------------|-------------------------------------------|--------------------------------------|------------------------------------------|
| 3578        | NM_,590                  | IL9         | interleukin 9                                                                    | 14.69       | inflammatory response,immune response     | extracellular region                 | cytokine activity                        |
| 4481        | NM_,2445                 | MSR1        | macrophage scavenger receptor 1                                                  | 3.30        | endocytosis                               | membrane                             | scavenger receptor activity              |
| 4762        | NM_,6161                 | NEUROG1     | neurogenin 1                                                                     | 0.11        | transcription,neuron differentiation      | nucleus                              | DNA binding                              |
| 26333       | NM_030901                | OR7A17      | olfactory receptor, family 7, subfamily A, member 17                             | 7.08        | sensory perception of smell               | plasma membrane                      | olfactory receptor activity              |
| 8342        | NM_,3521                 | HIST1H2BM   | histone cluster 1, H2bm                                                          | 3.00        | nucleosome assembly                       | nucleus                              | DNA binding                              |
| 690         | NM_,1208                 | BTF3L1      | basic transcription factor 3, like 1 pseudogene                                  | 0.09        |                                           | nucleus                              | ,transcription factor activity           |
| 59347       | NM_021631                | FKSG2       | apoptosis inhibitor                                                              | 4.94        | apoptosis                                 | cytoplasm                            |                                          |
| 2824        | AW148844                 | GPM6B       | glycoprotein M6B                                                                 | 0.28        | nervous system development                | nucleolus,membrane                   |                                          |
| 55361       | BC,3167                  | PI4K2A      | phosphatidylinositol 4-kinase type 2 alpha                                       | 0.12        | phosphatidylinositol biosynthetic process | cytoplasm,membrane                   | 1-phosphatidylinositol 4-kinase activity |
| 2053        | AF233336                 | EPHX2       | epoxide hydrolase 2, cytoplasmic                                                 | 0.33        | prostaglandin production                  | peroxisome,cytosol                   | ,4-nitrophenylphosphatase activity       |
| 634         | X16354                   | CEACAM1     | carcinoembryonic antigen-related cell adhesion molecule 1 (biliary glycoprotein) | 0.07        | angiogenesis                              | extracellular region,plasma membrane |                                          |
| 125         | M21692                   | ADH1B       | alcohol dehydrogenase 1B (class I), beta polypeptide                             | 0.08        | ethanol oxidation                         | cytoplasm                            | alcohol dehydrogenase activity           |
| 2861        | U87460                   | GPR37       | G protein-coupled receptor 37 (endothelin receptor type B-like)                  | 0.22        | signal transduction                       | endoplasmic reticulum                | receptor activity                        |
| 23127       | AF288389                 | GLT25D2     | glycosyltransferase 25 domain containing 2                                       | 3.18        | lipopolysaccharide biosynthetic process   | endoplasmic reticulum                | transferring glycosyl groups             |
| 7104        | BC,1386                  | TM4SF4      | transmembrane 4 L six family member 4                                            | 0.18        | glycosylation                             | membrane                             |                                          |

| Entrez Gene | Representative Public ID | Gene Symbol | Gene Title                                                                                         | Fold change | Gene Ontology Biological Process             | Gene Ontology Cellular Component | Gene Ontology Molecular Function                 |
|-------------|--------------------------|-------------|----------------------------------------------------------------------------------------------------|-------------|----------------------------------------------|----------------------------------|--------------------------------------------------|
| 7108        | AF096304                 | TM7SF2      | transmembrane 7 superfamily member 2                                                               | 0.31        | cholesterol biosynthetic process             | endoplasmic reticulum            | delta-sterol reductase activity                  |
| 4336        | D28114                   | MOBP        | myelin-associated oligodendrocyte basic protein WW domain containing E3 ubiquitin protein ligase 2 | 14.85       | nervous system development                   | mitochondrion                    | structural constituent of myelin sheath          |
| 11060       | BC,108                   | WWP2        | WW domain containing E3 ubiquitin protein ligase 2                                                 | 3.10        | protein modification                         | ubiquitin ligase complex         | ubiquitin-protein ligase activity                |
| 6672        | U36501                   | SP1,        | SP1, nuclear antigen                                                                               | 4.47        | negative regulation of transcription         | chromosome                       | ,DNA binding                                     |
| 4635        | AF116676                 | MYL4        | myosin, light chain 4, alkali; atrial, embryonic                                                   | 5.86        | regulation of the force of heart contraction | myosin complex                   | ATP binding                                      |
| 1,6         | AB035305                 | CDH8        | cadherin 8, type 2                                                                                 | 5.72        | cell adhesion                                | plasma membrane                  | calcium ion binding                              |
| 5467        | BC,2715                  | PPARD       | peroxisome proliferator-activated receptor delta                                                   | 3.12        | negative regulation of transcription         | nucleus                          | DNA binding, NF-kappaB binding                   |
| 8942        | BC,879                   | KYNU        | kynureninase                                                                                       | 3.49        | tryptophan catabolic process                 | cytoplasm,mitochondrion          | catalytic activity                               |
| 56134       | AF152308                 | PCDHA1      | protocadherin alpha 1 subfamily C, 2                                                               | 0.21        | cell adhesion                                | extracellular region,membrane,   | calcium ion binding                              |
| 84658       | AF239764                 | EMR3        | egf-like module containing, mucin-like, hormone receptor-like 3                                    | 18.04       | signal transduction                          | extracellular region,membrane    | ,signal transducer activity                      |
| 10395       | AF026219                 | DLC1        | deleted in liver cancer 1                                                                          | 3.01        | ,neural tube closure,heart morphogenesis     | nucleus,cytoplasm                | Rho GTPase activator activity,SH2 domain binding |
| 4771        | BC,3112                  | NF2         | neurofibromin 2 (merlin)                                                                           | 11.23       | negative regulation of cell-matrix adhesion  | ruffle,nucleus                   | cytoskeletal protein binding                     |
| 9194        | AF049608                 | SLC16A7     | solute carrier family 16, member 7 (monocarboxylic acid transporter 2)                             | 0.30        | pyruvate transport                           | membrane fraction                | symporter activity                               |
| 5,1         | AF081459                 | ORC5L       | origin recognition complex, subunit 5-like (yeast)                                                 | 5.50        | DNA replication                              | nucleus                          | DNA replication origin binding                   |

| Entrez Gene | Representative Public ID | Gene Symbol | Gene Title                                             | Fold change | Gene Ontology Biological Process     | Gene Ontology Cellular Component | Gene Ontology Molecular Function            |
|-------------|--------------------------|-------------|--------------------------------------------------------|-------------|--------------------------------------|----------------------------------|---------------------------------------------|
| 6,5         | AF031549                 | RHAG        | Rh-associated glycoprotein                             | 5.19        | ammonium transport                   | plasma membrane                  | ammonium transmembrane transporter activity |
| 140597      | AF063606                 | TCEAL2      | transcription elongation factor A (SII)-like 2         | 8.96        | transcription                        | nucleus                          |                                             |
| 2145        | AB,4818                  | EZH1        | enhancer of zeste homolog 1 (Drosophila)               | 4.52        | transcription,chromatin modification | nucleus                          | DNA binding,chromatin binding               |
| 25840       | AF113,7                  | METTL7A     | methyltransferase like 7A                              | 22.20       | metabolic process                    |                                  | methyltransferase activity                  |
| 64816       | AF280110                 | CYP3A43     | cytochrome P450, family 3, subfamily A, polypeptide 43 | 0.09        | oxidation reduction                  | endoplasmic reticulum            | monooxygenase activity                      |
| 6819        | AF186255                 | SULT1C2     | sulfotransferase family, cytosolic, 1C, member 2       | 0.32        | amine metabolic process              | cytoplasm                        | sulfotransferase activity                   |
| 51343       | AB013463                 | FZR1        | fizzy/cell division cycle 20 related 1 (Drosophila)    | 0.25        | mitotic cell cycle                   | nucleus                          | enzyme activator activity                   |
| 56114       | AF152507                 | PCDHGA1     | protocadherin gamma subfamily A, 1                     | 0.04        | homophilic cell adhesion             | membrane                         | calcium ion binding                         |
| 10461       | L08961                   | MERTK       | c-mer proto-oncogene tyrosine kinase                   | 8.65        | phosphorylation,visual perception    | photoreceptor outer segment      | ATP binding                                 |
| 161         | AA994666                 | AP2A2       | adaptor-related protein complex 2, alpha 2 subunit     | 0.08        | endocytosis                          | cytosol                          | protein binding                             |
| 10410       | BF338947                 | IFITM3      | interferon induced transmembrane protein 3 (1-8U)      | 0.30        | immune response                      | Golgi apparatus,membrane         |                                             |
| 3934        | NM_,5564                 | LCN2        | lipocalin 2                                            | 0.16        | response to virus                    | extracellular region             | transporter activity                        |
| 158471      | AL138349                 | PRUNE2      | prune homolog 2 (Drosophila)                           | 0.25        | apoptosis                            | cytoplasm                        | oxidoreductase activity                     |
| 57,7        | AI817041                 | CXCR7       | chemokine (C-X-C motif) receptor 7                     | 5.83        | signal transduction                  | membrane                         | receptor activity                           |
| 112464      | AI088622                 | PRKCDBP     | protein kinase C, delta binding protein                | 11.70       | negative regulation of cell cycle    |                                  | protein kinase C binding                    |

| Entrez Gene | Representative Public ID | Gene Symbol | Gene Title                                                           | Fold change | Gene Ontology Biological Process                 | Gene Ontology Cellular Component  | Gene Ontology Molecular Function                            |
|-------------|--------------------------|-------------|----------------------------------------------------------------------|-------------|--------------------------------------------------|-----------------------------------|-------------------------------------------------------------|
| 1117        | U58515                   | CHI3L2      | chitinase 3-like 2                                                   | 0.12        | carbohydrate metabolic process                   | extracellular space,mitochondrion | hydrolase activity                                          |
| 1028        | N95363                   | CDKN1C      | Cyclin-dependent kinase inhibitor 1C (p57, Kip2)                     | 0.13        | cell cycle                                       | nucleus                           | cyclin-dependent protein kinase inhibitor activity          |
| 3851        | X07695                   | KRT4        | keratin 4                                                            | 0.32        | epithelial cell differentiation                  | intermediate filament             | structural molecule activity                                |
| 23098       | AJ290445                 | SARM1       | sterile alpha and TIR motif containing 1                             | 0.21        | immune response                                  | microtubule                       | transmembrane receptor activity                             |
| 3676        | BG532690                 | ITGA4       | integrin, alpha 4 (antigen CD49D, alpha 4 subunit of VLA-4 receptor) | 12.46       | cell adhesion                                    | integrin complex                  | fibronectin binding                                         |
| 7329        | AA910614                 | UBE2I       | Ubiquitin-conjugating enzyme E2I (UBC9 homolog, yeast)               | 0.25        | cell cycle,mitosis                               | synaptonemal complex              | specific transcriptional repressor activity,ligase activity |
| 5134        | AA764988                 | PDCD2       | Programmed cell death 2                                              | 0.33        | apoptosis                                        | nucleus                           | DNA binding                                                 |
| 29896       | AW978896                 | TRA2A       | transformer 2 alpha homolog (Drosophila)                             | 0.31        | nuclear mRNA splicing                            | nucleus                           | RNA binding                                                 |
| 10114       | AW291829                 | HIPK3       | homeodomain interacting protein kinase 3                             | 0.15        | transcription                                    | nucleus                           | DNA binding,ATP binding                                     |
| 131566      | D29810                   | DCBLD2      | discoidin, CUB and LCCL domain containing 2                          | 9.51        | cell adhesion,negative regulation of cell growth | membrane                          | protein binding                                             |
| 2012        | BF445047                 | EMP1        | epithelial membrane protein 1                                        | 0.30        | cell proliferation                               | membrane                          |                                                             |
| 54474       | AI732381                 | KRT20       | keratin 20                                                           | 0.28        | apoptosis                                        | cytoplasm                         | structural molecule activity                                |
| 5789        | BF062299                 | PTPRD       | protein tyrosine phosphatase, receptor type, D                       | 0.18        | dephosphorylation                                | membrane                          | phosphoprotein phosphatase activity                         |
| 9046        | AI828929                 | DOK2        | docking protein 2, 56kDa                                             | 3.43        | Ras protein signal transduction                  |                                   | tyrosine kinase signaling                                   |
| 11238       | AW,3516                  | CA5B        | carbonic anhydrase VB, mitochondrial                                 | 0.15        | one-carbon compound metabolic process            | mitochondrion                     | carbonate dehydratase activity                              |

| Entrez Gene   | Representative Public ID | Gene Symbol        | Gene Title                                                  | Fold change | Gene Ontology Biological Process             | Gene Ontology Cellular Component               | Gene Ontology Molecular Function                      |
|---------------|--------------------------|--------------------|-------------------------------------------------------------|-------------|----------------------------------------------|------------------------------------------------|-------------------------------------------------------|
| 7205          | BE964082                 | TRIP6              | thyroid hormone receptor interactor 6                       | 4.53        | release of cytoplasmic sequestered NF-kappaB | interleukin-1 receptor complex                 | interleukin-1 receptor binding                        |
| 9260          | AW206786                 | PDLIM7             | PDZ and LIM domain 7 (enigma)                               | 0.33        | endocytosis                                  | cytoskeleton                                   | protein binding,zinc ion binding                      |
| 22924         | AI885178                 | MAPRE3             | microtubule-associated protein, RP/EB family, member 3      | 4.25        | cell cycle,mitosis                           | microtubule                                    | small GTPase regulator activity                       |
| 131185 / 5887 | T93562                   | LOC131185 / RAD23B | similar to RAD23B protein / RAD23 homolog B (S. cerevisiae) | 0.24        | DNA damage removal                           | nucleus                                        | damaged DNA binding                                   |
| 23522         | NM_012330                | MYST4              | MYST histone acetyltransferase (monocytic leukemia) 4       | 4.37        | nucleosome assembly                          | nucleosome                                     | DNA binding                                           |
| 797           | AA747379                 | CALCB              | calcitonin-related polypeptide beta                         | 11.07       | ,cellular calcium ion homeostasis            | extracellular region                           | neuropeptide hormone activity                         |
| 3205          | U41813                   | HOXA9              | homeobox A9                                                 | 17.11       | transcription                                | nucleus                                        | DNA binding                                           |
| 23086         | AB014524                 | EXPH5              | exophilin 5                                                 | 0.14        | protein transport                            |                                                | protein binding,Rab GTPase binding                    |
| 90333         | BE541042                 | ZNF468             | zinc finger protein 468                                     | 8.61        | transcription                                | nucleus                                        | DNA binding                                           |
| 149076        | AK021842                 | ZNF362             | Zinc finger protein 362                                     | 0.06        | transcription                                | nucleus                                        | DNA binding                                           |
| 26032         | BF977837                 | SUSD5              | sushi domain containing 5                                   | 5.36        | cell adhesion                                | membrane                                       | hyaluronic acid binding                               |
| 6480          | X17247                   | ST6GAL1            | ST6 beta-galactosamide alpha-2,6-sialyltransferase 1        | 5.62        | glycosylation,humoral immune response        | ,extracellular region,Golgi apparatus,membrane | beta-galactoside alpha-2,6-sialyltransferase activity |
| 23020         | AK021418                 | SNRNP2,            | small nuclear ribonucleoprotein 2,kDa (U5)                  | 3.34        | nuclear mRNA splicing, via spliceosome       | nucleus,spliceosome                            | ATP binding                                           |
| 2549          | AL049449                 | GAB1               | GRB2-associated binding protein 1                           | 0.08        | activation of MAPK activity                  | cytosol                                        | SH3/SH2 adaptor activity                              |
| 158586 / 7789 | BF509566                 | ZXDA / ZXDB        | zinc finger, X-linked, duplicated A                         | 0.05        | transcription                                | nucleus                                        | nucleic acid binding                                  |



| Entrez Gene               | Representative Public ID | Gene Symbol                        | Gene Title                                                                                         | Fold change | Gene Ontology Biological Process              | Gene Ontology Cellular Component | Gene Ontology Molecular Function        |
|---------------------------|--------------------------|------------------------------------|----------------------------------------------------------------------------------------------------|-------------|-----------------------------------------------|----------------------------------|-----------------------------------------|
| 4703                      | R78299                   | NEB                                | nebulin                                                                                            | 7.65        | regulation of actin filament length           | cytoskeleton                     | actin binding                           |
| 9699                      | AF,7156                  | RIMS2                              | regulating synaptic membrane exocytosis 2                                                          | 0.30        | intracellular protein transport               | membrane                         | Rab GTPase binding                      |
| 27352                     | AI081779                 | SGSM3                              | small G protein signaling modulator 3                                                              | 3.00        | cell cycle                                    | cytoplasm                        | ,Rab GTPase activator activity          |
| 23304                     | AK,1118                  | UBR2                               | Ubiquitin protein ligase E3 component n-recognin 2                                                 | 0.22        | ubiquitin-dependent protein catabolic process | ubiquitin ligase complex         | ubiquitin-protein ligase activity       |
| 54516                     | AU145135                 | MTRF1L                             | Mitochondrial translational release factor 1-like                                                  | 3.58        | translational termination                     | mitochondrion                    | translation release factor activity     |
| 1,133748 / 389524 / 84163 | AC,4883                  | GTF2IRD2 / GTF2IRD2B / LOC1,133748 | GTF2I repeat domain containing 2 / GTF2I repeat domain containing 2B / similar to GTF2IRD2 protein | 3.67        | transcription                                 | nucleus                          | DNA binding                             |
| 22987                     | AB028977                 | SV2C                               | synaptic vesicle glycoprotein 2C                                                                   | 0.09        | neurotransmitter transport                    | synaptic vesicle,membrane        | transporter activity                    |
| 6964                      | AA284903                 | TRD                                | T cell receptor delta locus                                                                        | 3.19        | immune response                               | plasma membrane                  | MHC protein binding                     |
| 2710 / 2713               | X78713                   | GK / GK3P                          | glycerol kinase / glycerol kinase 3 pseudogene                                                     | 0.31        | glycerol metabolic process                    | ,mitochondrial outer membrane    | glycerol kinase activity                |
| 1,128,701                 | AL390738                 | HNRNPA1 / LOC643033                | heterogeneous nuclear ribonucleoprotein A1                                                         | 3.65        | nuclear mRNA splicing                         | spliceosom                       | single-stranded DNA binding,RNA binding |
| 2683                      | U10473                   | B4GALT1                            | UDP-Gal:betaGlcNAc beta 1,4-galactosyltransferase , polypeptide 1                                  | 0.04        | acute inflammatory response                   | Golgi apparatus                  | beta-N-acetylglucosaminylglycopeptide   |
| 5618                      | S78505                   | PRLR                               | prolactin receptor                                                                                 | 4.04        | steroid biosynthetic process,anti-apoptosis   | extracellular region,membrane    | cytokine receptor activity              |
| 54532                     | AK025301                 | USP53                              | ubiquitin specific peptidase 53                                                                    | 0.06        | ubiquitin-dependent protein catabolic process |                                  | ubiquitin thiolesterase activity        |
| 91807                     | BF114815                 | MYLK3                              | myosin light chain kinase 3                                                                        | 14.31       | phosphorylation                               |                                  | ,ATP binding,transferase activity       |

| Entrez Gene  | Representative Public ID | Gene Symbol     | Gene Title                                                                          | Fold change | Gene Ontology Biological Process        | Gene Ontology Cellular Component | Gene Ontology Molecular Function                       |
|--------------|--------------------------|-----------------|-------------------------------------------------------------------------------------|-------------|-----------------------------------------|----------------------------------|--------------------------------------------------------|
| 563 / 646282 | AC_4522                  | AZGP1 / AZGP1P1 | zinc-binding / alpha-2-glycoprotein 1, zinc-binding pseudogene 1                    | 5.28        | immune response, cell adhesion          | extracellular region             | ribonuclease activity                                  |
| 9282         | AK023368                 | MED14           | mediator complex subunit 14                                                         | 5.18        | transcription                           | mediator complex                 | RNA polymerase II transcription mediator activity      |
| 5369         | S64288                   | PMCHL1          | pro-melanin-concentrating hormone-like 1                                            | 24.99       | synaptic transmission                   | extracellular region             | melanin-concentrating hormone activity                 |
| 164022       | AL022240                 | PPIAL4A         | peptidylprolyl isomerase A (cyclophilin A)-like 4A                                  | 3.38        | protein folding                         | cytoplasm                        | isomerase activity                                     |
| 7142         | X63759                   | TNP2            | transition protein 2 (during histone to protamine replacement)                      | 0.01        | multicellular organismal development    | chromosome                       | DNA binding                                            |
| 6556         | AI346187                 | SLC11A1         | solute carrier family 11 (proton-coupled divalent metal ion transporters), member 1 | 0.12        | iron ion transport, immune response     | membrane                         | iron ion binding                                       |
| 1373         | W80357                   | CPS1            | carbamoyl-phosphate synthetase 1, mitochondrial                                     | 0.30        | glutamine metabolic process             | mitochondrion                    | carbamoyl-phosphate synthase activity                  |
| 11333        | AA464753                 | PDAP1           | PDGFA associated protein 1                                                          | 8.65        | signal transduction, cell proliferation |                                  |                                                        |
| 9123         | AA853175                 | SLC16A3         | Solute carrier family 16, member 3 (monocarboxylic acid transporter 4)              | 0.26        | monocarboxylic acid transport           | plasma membrane                  | monocarboxylic acid transmembrane transporter activity |
| 23469        | AL050329                 | PHF3            | PHD finger protein 3                                                                | 5.37        | transcription                           | nucleus                          | zinc ion binding                                       |
| 116496       | AF288391                 | FAM129A         | family with sequence similarity 129, member A                                       | 3.46        | phosphorylation                         | cytoplasm                        |                                                        |
| 56949        | NM_020196                | XAB2            | XPA binding protein 2                                                               | 0.23        | DNA repair, RNA splicing                | nucleus                          | protein binding                                        |

| Entrez Gene | Representative Public ID | Gene Symbol | Gene Title                                                                               | Fold change | Gene Ontology Biological Process         | Gene Ontology Cellular Component | Gene Ontology Molecular Function                        |
|-------------|--------------------------|-------------|------------------------------------------------------------------------------------------|-------------|------------------------------------------|----------------------------------|---------------------------------------------------------|
| 65982       | NM_023926                | ZSCAN18     | zinc finger and SCAN domain containing 18                                                | 3.91        | transcription                            | nucleus                          | transcription factor activity                           |
| 26585       | NM_013372                | GREM1       | gremlin 1, cysteine knot superfamily, homolog (Xenopus laevis)                           | 3.88        | organ morphogenesis                      | extracellular region             | cytokine activity                                       |
| 7227        | NM_014112                | TRPS1       | trichorhinophalangeal syndrome I                                                         | 16.19       | transcription                            | nucleus                          | transcription factor activity                           |
| 408         | NM_,4041                 | ARRB1       | arrestin, beta 1                                                                         | 0.04        | phototransduction                        | membrane fraction                | enzyme inhibitor activity                               |
| 57134       | NM_020379                | MAN1C1      | mannosidase, alpha, class 1C, member 1                                                   | 0.33        | protein glycosylation                    | Golgi apparatus                  | mannosyl-oligosaccharide 1,2-alpha-mannosidase activity |
| 9388        | NM_,6033                 | LIPG        | lipase, endothelial                                                                      | 15.10       | lipid metabolic process                  | extracellular region             | catalytic activity, lipoprotein lipase activity         |
| 10891       | NM_013261                | PPARGC1A    | peroxisome proliferator-activated receptor gamma, coactivator 1 alpha                    | 0.03        | transcription                            | nucleus                          | DNA binding                                             |
| 79977       | NM_024915                | GRHL2       | grainyhead-like 2 (Drosophila)                                                           | 7.76        | transcription                            | nucleus                          | DNA binding                                             |
| 3773        | NM_018658                | KCNJ16      | potassium inwardly-rectifying channel, subfamily J, member 16                            | 0.17        | potassium ion transport                  | membrane                         | ion channel activity                                    |
| 81545       | NM_024862                | FBXO38      | F-box protein 38                                                                         | 7.08        | protein modification                     | nucleus                          |                                                         |
| 2266        | NM_,509                  | FGG         | fibrinogen gamma chain                                                                   | 0.26        | platelet activation                      | extracellular region             | calcium ion binding                                     |
| 10734       | NM_012447                | STAG3       | stromal antigen 3                                                                        | 13.99       | meiosis                                  | nucleus                          | binding                                                 |
| 4883        | AI628360                 | NPR3        | natriuretic peptide receptor C/guanylate cyclase C (atrionatriuretic peptide receptor C) | 3.69        | inhibition of adenylate cyclase activity | membrane                         | receptor activity                                       |
| 59349       | NM_021633                | KLHL12      | kelch-like 12 (Drosophila)                                                               | 0.33        | Wnt receptor signaling pathway           |                                  | protein binding                                         |

| Entrez Gene | Representative Public ID | Gene Symbol | Gene Title                                                                       | Fold change | Gene Ontology Biological Process          | Gene Ontology Cellular Component    | Gene Ontology Molecular Function       |
|-------------|--------------------------|-------------|----------------------------------------------------------------------------------|-------------|-------------------------------------------|-------------------------------------|----------------------------------------|
| 50856       | NM_016184                | CLEC4A      | C-type lectin domain family 4, member A                                          | 4.23        | immune response                           | nucleus,cytoplasm,membrane          | sugar binding                          |
| 23746       | NM_014336                | AIPL1       | aryl hydrocarbon receptor interacting protein-like 1                             | 3.72        | visual perception                         | photoreceptor inner segment,nucleus | farnesylated protein binding           |
| 56605       | NM_019891                | ERO1LB      | ERO1-like beta (S. cerevisiae)                                                   | 0.30        | electron transport chain                  | endoplasmic reticulum               | electron carrier activity              |
| 57716       | NM_020956                | PRX         | periaxin                                                                         | 0.22        | axon ensheathment                         | nucleus,cytoplasm                   | protein binding                        |
| 64097       | NM_022140                | EPB41L4A    | erythrocyte membrane protein band 4.1 like 4A                                    | 0.20        |                                           | cytoplasm                           | cytoskeletal protein binding           |
| 55762       | NM_018260                | ZNF701      | zinc finger protein 701                                                          | 3.56        | transcription                             | nucleus                             | DNA binding                            |
| 9227        | NM_,4744                 | LRAT        | lecithin retinol acyltransferase (phosphatidylcholine-retinol O-acyltransferase) | 0.23        | vitamin A metabolic process               | endoplasmic reticulum               | acyltransferase activity               |
| 641,        | NM_022142                | ELSPBP1     | epididymal sperm binding protein 1                                               | 0.19        | single fertilization                      | extracellular region                |                                        |
| 11095       | NM_,7037                 | ADAMTS8     | ADAM metalloproteinase with thrombospondin type 1 motif, 8                       | 0.27        | negative regulation of cell proliferation | extracellular matrix                | metalloendopeptidase activity          |
| 63971       | NM_022113                | KIF13A      | kinesin family member 13A                                                        | 13.15       | microtubule-based movement                | microtubule                         | microtubule motor activity,ATP binding |
| 25879       | NM_014156                | WDSOF1      | WD repeats and SOF1 domain containing                                            | 11.41       | ribosome biogenesis                       | ribonucleoprotein complex           |                                        |
| 29072       | NM_014159                | SETD2       | SET domain containing 2                                                          | 3.18        | transcription                             | nucleus                             | transferase activity                   |
| 81033       | NM_030779                | KCNH6       | potassium voltage-gated channel, subfamily H (eag-related), member 6             | 4.48        | transcription,potassium ion transport     | membrane                            | ion channel activity                   |
| 11132       | NM_023089                | CAPN10      | calpain 10                                                                       | 9.73        | egulation of intracellular transport      | cytosol,membrane                    | cysteine-type endopeptidase activity   |

| Entrez Gene | Representative Public ID | Gene Symbol | Gene Title                                                    | Fold change | Gene Ontology Biological Process   | Gene Ontology Cellular Component | Gene Ontology Molecular Function                      |
|-------------|--------------------------|-------------|---------------------------------------------------------------|-------------|------------------------------------|----------------------------------|-------------------------------------------------------|
| 7099        | NM_,3266                 | TLR4        | toll-like receptor 4                                          | 5.42        | immune response                    | plasma membrane                  | lipopolysaccharide binding                            |
| 64377       | NM_022467                | CHST8       | carbohydrate (N-acetylgalactosamine 4-O) sulfotransferase 8   | 0.15        | central nervous system development | ,Golgi membrane                  | sulfotransferase activity                             |
| 9132        | NM_,47,                  | KCNQ4       | potassium voltage-gated channel, KQT-like subfamily, member 4 | 0.20        | potassium ion transport            | potassium channel complex        | ,ion channel activity                                 |
| 55584       | NM_017581                | CHRNA9      | cholinergic receptor, nicotinic, alpha 9                      | 3.87        | calcium ion transport              | membrane                         | ion channel activity                                  |
| 54848       | NM_0177,                 | FLJ20184    | hypothetical protein FLJ20184                                 | 4.08        | Rho protein signal transduction    | intracellular                    | Rho guanyl-nucleotide exchange factor activity        |
| 79366       | NM_030763                | NSBP1       | nucleosomal binding protein 1                                 | 0.13        | transcription                      | nucleus                          | chromatin binding                                     |
| 54575       | NM_019076                | UGT1A10     | UDP glucuronosyltransferase 1 family                          | 7.15        | xenobiotic metabolic process       | endoplasmic reticulum            | UDP-glycosyltransferase activity                      |
| 80329       | NM_025218                | ULBP1       | UL16 binding protein 1                                        | 4.93        | immune response                    | endoplasmic reticulum            | MHC class I receptor activity                         |
| 7145        | AL046979                 | TNS1        | tensin 1                                                      | 11.08       | cell migration                     | cytoplasm                        | actin binding                                         |
| 73,51       | AK022663                 | ZNF814      | zinc finger protein 814                                       | 15.73       | transcription                      | nucleus                          | DNA binding,zinc ion binding                          |
| 342538      | AJ278883                 | NACA2       | nascent polypeptide-associated complex alpha subunit 2        | 3.80        | protein transport                  | nucleus,cytoplasm                |                                                       |
| 25818       | AF243527                 | KLK5        | kallikrein-related peptidase 5                                | 3.54        | proteolysis                        | extracellular region             | serine-type endopeptidase activity,peptidase activity |
| 56893       | AK023354                 | UBQLN4      | ubiquilin 4                                                   | 0.29        | protein modification process       | nucleus,cytoplasm                | protein binding                                       |
| 3268        | H07885                   | AGFG2       | ArfGAP with FG repeats 2                                      | 0.18        | ARF GTPase activity                |                                  | ARF GTPase activator activity                         |
| 28988       | AF077353                 | DBNL        | drebrin-like                                                  | 0.14        | endocytosis,immune responses       | ruffle,intracellular,cytoplasm   | actin binding                                         |
| 22801       | AF109681                 | ITGA11      | integrin, alpha 11                                            | 19.61       | cell adhesion                      | integrin complex                 | magnesium ion binding                                 |

| Entrez Gene | Representative Public ID | Gene Symbol | Gene Title                                                        | Fold change | Gene Ontology Biological Process           | Gene Ontology Cellular Component | Gene Ontology Molecular Function                                               |
|-------------|--------------------------|-------------|-------------------------------------------------------------------|-------------|--------------------------------------------|----------------------------------|--------------------------------------------------------------------------------|
| 57733       | AW235567                 | GBA3        | glucosidase, beta, acid 3 (cytosolic)                             | 3.26        | glycoside catabolic process                | cytoplasm                        | beta-galactosidase activity,hydrolase activity                                 |
| 8708        | AF117222                 | B3GALT1     | UDP-Gal:betaGlcNAc beta 1,3-galactosyltransferase , polypeptide 1 | 3.42        | protein glycosylation                      | Golgi's organs                   | UDP-galactose:beta-N-acetylglucosamine beta-1,3-galactosyltransferase activity |
| 25930       | BF057506                 | PTPN23      | protein tyrosine phosphatase, non-receptor type 23                | 0.23        | dephosphorylation                          | cytoplasmic vesicle              | phosphoprotein phosphatase activity                                            |
| 55964       | AF285109                 | 41520       | septin 3                                                          | 0.05        | cell cycle                                 | nucleus,cytoplasm                | GTP binding                                                                    |
| 90592       | AL136732                 | ZNF7,       | zinc finger protein 7,                                            | 0.13        | transcription                              | nucleus                          | DNA binding,zinc ion binding                                                   |
| 27010       | AB028138                 | TPK1        | thiamin pyrophosphokinase 1                                       | 0.30        | thiamin metabolic process                  |                                  | ATP binding,kinase activity                                                    |
| 26166       | AY,9106                  | RGS22       | regulator of G-protein signaling 22                               | 14.49       | negative regulation of signal transduction |                                  | signal transducer activity                                                     |
| 56126       | AF131761                 | PCDHB10     | protocadherin beta 10                                             | 0.25        | cell adhesion                              | plasma membrane                  | calcium ion binding                                                            |
| 56670       | AF348078                 | SUCNR1      | succinate receptor 1                                              | 0.09        | signal transduction                        | plasma membrane                  | signal transducer activity                                                     |
| 9818        | BC,1104                  | NUPL1       | nucleoporin like 1                                                | 3.23        | protein transport,mRNA transport           | nuclear                          |                                                                                |
| 57380       | BC,1028                  | MRS2        | MRS2 magnesium homeostasis factor homolog (S. cerevisiae)         | 3.05        | ion transport                              | mitochondrial                    | magnesium ion binding                                                          |
| 27198       | AF345568                 | GPR81       | G protein-coupled receptor 81                                     | 0.14        | signal transduction                        | plasma membrane                  | signal transducer activity                                                     |
| 56995       | AF288480                 | TULP4       | tubby like protein 4                                              | 0.20        | transcription                              | nucleus                          | transcription factor activity                                                  |
| 50940       | AB038041                 | PDE11A      | phosphodiesterase 11A                                             | 5.79        | signal transduction                        | cytoplasm                        | catalytic activity                                                             |
| 56163       | AF285603                 | RNF17       | ring finger protein 17                                            | 0.16        | multicellular organismal development       | nucleus,cytoplasm                | nucleic acid binding                                                           |
| 150696      | NM_144707                | PROM2       | prominin 2                                                        | 3.37        |                                            | membrane                         |                                                                                |

| Entrez Gene | Representative Public ID | Gene Symbol | Gene Title                                                                     | Fold change | Gene Ontology Biological Process                     | Gene Ontology Cellular Component | Gene Ontology Molecular Function               |
|-------------|--------------------------|-------------|--------------------------------------------------------------------------------|-------------|------------------------------------------------------|----------------------------------|------------------------------------------------|
| 140803      | AF350881                 | TRPM6       | transient receptor potential cation channel, subfamily M, member 6             | 3.36        | phosphorylation,calcium ion transport                | Golgi apparatus                  | protein serine/threonine kinase activity       |
| 6542        | AA876372                 | SLC7A2      | solute carrier family 7 (cationic amino acid transporter, y+ system), member 2 | 0.31        | production of nitric oxide                           | cytoplasm,membrane               | L-ornithine transmembrane transporter activity |
| 26298       | AI763378                 | EHF         | Ets homologous factor                                                          | 0.23        | transcription                                        | nucleus                          | DNA binding                                    |
| 6850        | BF593625                 | SYK         | spleen tyrosine kinase                                                         | 0.06        | activation of MAPK activity,serotonin secretion      | nucleolus,cytoplasm              | nucleotide binding,protein kinase activity     |
| 134111      | H17038                   | FLJ25076    | probable ubiquitin-conjugating enzyme E2 FLJ25076                              | 3.72        | post-translational protein modification              |                                  | ubiquitin-protein ligase activity              |
| 117         | AW451961                 | ADCYAP1R1   | Adenylate cyclase activating polypeptide 1 (pituitary) receptor type I         | 3.78        | receptor linked signal transduction                  | plasma membrane                  | signal transducer activity                     |
| 34          | AV646610                 | ID4         | Inhibitor of DNA binding 4, dominant negative helix-loop-helix protein         | 0.30        | ,G1/S transition of mitotic cell cycle,transcription | nucleus                          | transcription corepressor activity             |
| 222171      | AI347918                 | PRR15       | proline rich 15                                                                | 0.31        | organismal development                               |                                  |                                                |
| 9953        | AA78,67                  | HS3ST3B1    | heparan sulfate (glucosamine) 3-O-sulfotransferase 3B1                         | 0.31        | heparan sulfate proteoglycan biosynthetic process    | Golgi apparatus                  | sulfotransferase activity                      |
| 1958        | AI459194                 | EGR1        | Early growth response 1                                                        | 0.14        | negative regulation of transcription                 | ,nucleus                         | transcription factor activity                  |
| 157506      | AV697515                 | RDH10       | retinol dehydrogenase 10 (all-trans)                                           | 0.32        | visual perception                                    | endoplasmic reticulum            | retinol dehydrogenase activity                 |
| 4907        | AI086864                 | NT5E        | 5'-nucleotidase, ecto (CD73)                                                   | 5.14        | DNA metabolic process                                | plasma membrane                  | 5'-nucleotidase activity                       |
| 138050      | BF433,5                  | HGSNAT      | heparan-alpha-glucosaminide N-acetyltransferase                                | 0.10        | glycosaminoglycan metabolic process                  | lysosomal membrane               | acyltransferase activity                       |

| Entrez Gene | Representative Public ID | Gene Symbol | Gene Title                                                                         | Fold change | Gene Ontology Biological Process             | Gene Ontology Cellular Component | Gene Ontology Molecular Function                            |
|-------------|--------------------------|-------------|------------------------------------------------------------------------------------|-------------|----------------------------------------------|----------------------------------|-------------------------------------------------------------|
| 56849       | BF591534                 | TCEAL7      | transcription elongation factor A (SII)-like 7                                     | 0.07        | transcription                                | nucleus                          | translation elongation factor activity                      |
| 4093        | AA934610                 | SMAD9       | SMAD family member 9                                                               | 7.48        | transcription                                | nucleus                          | transcription factor activity                               |
| 59352       | AA524536                 | LGR6        | leucine-rich repeat-containing G protein-coupled receptor 6                        | 0.22        | signal transduction                          | plasma membrane                  | signal transducer activity                                  |
| 644538      | AW242,9                  | LOC644538   | hypothetical protein LOC644538                                                     | 0.06        | negative regulation of complement activation | extracellular region             | serine-type endopeptidase inhibitor activity                |
| 10160       | BF725250                 | FARP1       | FERM, RhoGEF (ARHGEF) and pleckstrin domain protein 1 (chondrocyte-derived)        | 0.08        | Rho protein signal transduction              | cytoskeleton                     | Rho guanyl-nucleotide exchange factor activity              |
| 6657        | AI669815                 | SOX2        | SRY (sex determining region Y)-box 2                                               | 0.07        | negative regulation of transcription         | nucleus                          | DNA bindin                                                  |
| 65975       | AI703417                 | STK33       | serine/threonine kinase 33                                                         | 10.64       | phosphorylation                              | cytoplasm                        | nucleotide binding,protein serine/threonine kinase activity |
| 1356        | AI684991                 | CP          | ceruloplasmin (ferroxidase)                                                        | 0.26        | copper ion transport                         | extracellular region             | ferroxidase activity                                        |
| 3778        | AI832576                 | KCNMA1      | potassium large conductance calcium-activated channel, subfamily M, alpha member 1 | 3.29        | response to hypoxia                          | potassium channel complex        | ion channel activity                                        |
| 51477       | AI675636                 | ISYNA1      | inositol-3-phosphate synthase 1                                                    | 4.27        | inositol biosynthetic process                | cytoplasm                        | inositol-3-phosphate synthase activity                      |
| 931         | AI862674                 | MS4A1       | membrane-spanning 4-domains, subfamily A, member 1                                 | 0.07        | immune response                              | membrane                         | receptor activity                                           |
| 137075      | BF11,53                  | CLDN23      | claudin 23                                                                         | 3.99        | calcium-independent cell-cell adhesion       | membrane                         | structural molecule activity                                |
| 170261      | AV725825                 | ZCCHC12     | zinc finger, CCHC domain containing 12                                             | 19.42       | transcription                                |                                  | nucleic acid binding                                        |
| 63035       | N57931                   | BCORL1      | BCL6 co-repressor-like 1                                                           | 5.17        | transcription                                | nucleus                          |                                                             |



| Entrez Gene     | Representative Public ID | Gene Symbol    | Gene Title                                                              | Fold change | Gene Ontology Biological Process                        | Gene Ontology Cellular Component               | Gene Ontology Molecular Function                            |
|-----------------|--------------------------|----------------|-------------------------------------------------------------------------|-------------|---------------------------------------------------------|------------------------------------------------|-------------------------------------------------------------|
| 80115           | AA532851                 | BAIAP2L2       | BAI1-associated protein 2-like 2                                        | 3.74        | signal transduction                                     | nucleus,mitochondrion                          | SH3 domain binding                                          |
| 65266           | AW082836                 | WNK4           | WNK lysine deficient protein kinase 4                                   | 0.07        | phosphorylation,chloride transport                      | cytoplasm                                      | nucleotide binding,protein serine/threonine kinase activity |
| 57158           | AA716165                 | JPH2           | junctionophilin 2                                                       | 0.07        | elevation of cytosolic calcium ion concentration        | membrane fraction                              | protein binding                                             |
| 144132          | AL040892                 | DNHD1          | dynein heavy chain domain 1                                             | 0.10        | protein targeting to mitochondrion transport            | mitochondrion                                  | microtubule motor activity                                  |
| 55752           | AI333326                 | 41528          | septin 11                                                               | 3.98        | cell cycle                                              | nucleus,cytoplasm                              | nucleotide binding                                          |
| 116442          | AV724323                 | RAB39B         | RAB39B, member RAS oncogene family                                      | 3.26        | small GTPase mediated signal transduction               | cytoplasm,membrane                             | GTP binding                                                 |
| 345557          | AI694325                 | PLCXD3         | phosphatidylinositol-specific phospholipase C, X domain containing 3    | 0.17        | intracellular signaling cascade,lipid catabolic process |                                                | phospholipase C activity,signal transducer activity         |
| 2151            | AI378647                 | F2RL2          | coagulation factor II (thrombin) receptor-like 2                        | 3.80        | signal transduction                                     | plasma membrane                                | phosphoinositide phospholipase C activity                   |
| 286436 / 767811 | H09657                   | H2BFM / H2BFXP | H2B histone family, member M / H2B histone family, member X, pseudogene | 0.14        | nucleosome assembly                                     | chromosome                                     | DNA binding                                                 |
| 4036            | R73030                   | LRP2           | low density lipoprotein-related protein 2                               | 0.30        | glycosylation,vitamin metabolic process                 | endosome,endoplasmic reticulum,Golgi apparatus | receptor activity,SH3 domain binding                        |
| 64321           | AI821669                 | SOX17          | SRY (sex determining region Y)-box 17                                   | 0.18        | vasculogenesis,transcription                            | nucleus                                        | DNA binding                                                 |
| 6635            | AU144102                 | SNRPE          | small nuclear ribonucleoprotein polypeptide E                           | 0.23        | RNA splicing                                            | ribonucleoprotein complex                      | RNA binding                                                 |
| 79365           | R93946                   | BHLHE41        | basic helix-loop-helix family, member e41                               | 8.84        | transcription                                           | nucleus                                        | transcription regulator activity                            |
| 359787          | AI066520                 | DPPA3          | developmental pluripotency associated 3                                 | 0.06        |                                                         | nucleus,cytoplasm                              |                                                             |

| Entrez Gene | Representative Public ID | Gene Symbol | Gene Title                                                        | Fold change | Gene Ontology Biological Process          | Gene Ontology Cellular Component     | Gene Ontology Molecular Function                                    |
|-------------|--------------------------|-------------|-------------------------------------------------------------------|-------------|-------------------------------------------|--------------------------------------|---------------------------------------------------------------------|
| 159963      | AV7,405                  | SLC5A12     | solute carrier family 5 (sodium/glucose cotransporter), member 12 | 0.10        | sodium ion transport                      | membrane                             | transporter activity                                                |
| 130120      | BF056837                 | REG3G       | regenerating islet-derived 3 gamma                                | 5.26        | inflammatory response                     | extracellular region                 | sugar binding                                                       |
| 55349       | AJ272267                 | CHDH        | choline dehydrogenase                                             | 0.23        | alcohol metabolic process                 | mitochondrion                        | oxidoreductase activity                                             |
| 79674       | AK022666                 | VEPH1       | ventricular zone expressed PH domain homolog 1 (zebrafish)        | 0.04        | inflammatory response                     | extracellular region                 | zymosan binding                                                     |
| 57689       | AW118214                 | LRRC4C      | leucine rich repeat containing 4C                                 | 0.06        | regulation of axonogenesis                | membrane                             | protein binding                                                     |
| 83891       | AK026814                 | SNX25       | sorting nexin 25                                                  | 4.27        | transport,cell communication              |                                      | signal transducer activity,phosphoinositide binding                 |
| 80725       | BF062187                 | SNIP        | SNAP25-interacting protein                                        | 0.09        | exocytosis                                | cytoskeleton                         | protein binding                                                     |
| 6689        | AK025419                 | SPIB        | Spi-B transcription factor (Spi-1/PU.1 related)                   | 0.12        | transcription                             | nucleus,cytoplasm                    | DNA binding                                                         |
| 57,7        | BE552368                 | CXCR7       | Chemokine (C-X-C motif) receptor 7                                | 3.82        | signal transduction                       | membrane                             | receptor activity                                                   |
| 7991        | AK026149                 | TUSC3       | tumor suppressor candidate 3                                      | 8.42        | protein amino acid N-linked glycosylation | endoplasmic reticulum                | dolichyl-diphosphooligosaccharide-protein glycotransferase activity |
| 404734      | AK024189                 | ANKHD1      | ankyrin repeat and KH domain containing 1                         | 4.02        | negative regulation of translation        | cytoplasm                            | RNA binding                                                         |
| 26272       | AF176703                 | FBXO4       | F-box protein 4                                                   | 0.17        | protein ubiquitination                    | ubiquitin ligase complex             | ,ubiquitin-protein ligase activity                                  |
| 51083       | AL556409                 | GAL         | galanin prepropeptide                                             | 3.16        | smooth muscle contraction,                | extracellular region,Golgi apparatus | neuropeptide hormone activity                                       |
| 168850      | AF218032                 | ZNF8,       | zinc finger protein 8,                                            | 3.18        | transcription                             | nucleus                              | DNA binding                                                         |
| 79869       | H96922                   | FLJ12529    | Pre-mRNA cleavage factor I                                        | 0.21        | nuclear mRNA splicin                      | nucleus                              | RNA binding                                                         |

| Entrez Gene | Representative Public ID | Gene Symbol | Gene Title                                                                     | Fold change | Gene Ontology Biological Process               | Gene Ontology Cellular Component | Gene Ontology Molecular Function               |
|-------------|--------------------------|-------------|--------------------------------------------------------------------------------|-------------|------------------------------------------------|----------------------------------|------------------------------------------------|
| 55633       | AK021840                 | TBC1D22B    | TBC1 domain family, member 22B                                                 | 0.30        | regulation of Rab GTPase activity              | intracellular                    | Rab GTPase activator activity                  |
| 648         | AB051459                 | EFCAB6      | EF-hand calcium binding domain 6                                               | 0.07        | transcription                                  | nucleus                          | calcium ion binding                            |
| 80274       | Z82214                   | SCUBE1      | signal peptide, CUB domain, EGF-like 1                                         | 8.44        | inflammatory response                          | extracellular region             | calcium ion binding                            |
| 353274      | AK026891                 | ZNF445      | zinc finger protein 445                                                        | 3.17        | transcription                                  | intracellular,nucleus            | DNA binding                                    |
| 259291      | AF264628                 | TAS2R45     | taste receptor, type 2, member 45                                              | 6.35        | sensory perception of taste                    | membrane                         | receptor activity                              |
| 571         | AF317902                 | BACH1       | BTB and CNC homology 1, basic leucine zipper transcription factor 1            | 0.28        | transcription                                  | nucleus                          | transcription factor activity                  |
| 51744       | AJ245377                 | CD244       | CD244 molecule, natural killer cell receptor 2B4                               | 8.81        | signal transduction                            | plasma membrane                  | receptor activity                              |
| 83401       | AF292387                 | ELOVL3      | elongation of very long chain fatty acids (FEN1/Elo2, SUR4/Elo3, yeast)-like 3 | 0.10        | fatty acid biosynthetic process                | endoplasmic reticulum            |                                                |
| 81696       | AL096770                 | OR5V1       | olfactory receptor, family 5, subfamily V, member 1                            | 0.10        | sensory perception of smell                    | membrane                         | olfactory receptor activity                    |
| 1337        | U82486                   | COX6A1      | cytochrome c oxidase subunit VIa polypeptide 1 human                           | 0.16        | generation of precursor metabolites and energy | ,mitochondrion                   | cytochrome-c oxidase activity                  |
| 59269       | AI8,713                  | HIVEP3      | immunodeficiency virus type I enhancer binding protein 3                       | 0.32        | transcription                                  | nucleus,cytoplasm                | transcription activator activity               |
| 121536      | AI580966                 | AEBP2       | AE binding protein 2                                                           | 3.44        | transcription,chromatin modification           | nucleus                          | DNA binding,zinc ion binding                   |
| 54941       | AI969697                 | RNF125      | ring finger protein 125                                                        | 3.93        | immune response                                | intracellular                    | zinc ion binding,ligase activity               |
| 84307       | BG027325                 | ZNF397      | zinc finger protein 397                                                        | 0.04        | transcription                                  | nucleus,cytoplasm                | transcription factor activity,zinc ion binding |

| Entrez Gene | Representative Public ID | Gene Symbol | Gene Title                                                                                                     | Fold change | Gene Ontology Biological Process        | Gene Ontology Cellular Component | Gene Ontology Molecular Function                         |
|-------------|--------------------------|-------------|----------------------------------------------------------------------------------------------------------------|-------------|-----------------------------------------|----------------------------------|----------------------------------------------------------|
| 256435      | AW963951                 | ST6GALNAC3  | ST6 (alpha-N-acetylneuraminyl-2,3-beta-galactosyl-1,3)-N-acetylgalactosaminidase alpha-2,6-sialyltransferase 3 | 3.42        | protein amino acid glycosylation        | Golgi apparatus                  | transferase activity                                     |
| 132864      | BE646645                 | CPEB2       | Cytoplasmic polyadenylation element binding protein 2                                                          | 4.50        | translation                             | cytoplasm                        | RNA binding                                              |
| 77          | AW272167                 | ZNF141      | zinc finger protein 141                                                                                        | 3.64        | transcription                           | nucleus                          | specific RNA polymerase II transcription factor activity |
| 9181        | AW299534                 | ARHGEF2     | Rho/rac guanine nucleotide exchange factor (GEF) 2                                                             | 0.14        | cell morphogenesis                      | cytoplasm,Golgi apparatus        | guanyl-nucleotide exchange factor activity               |
| 284443      | AI758697                 | ZNF493      | zinc finger protein 493                                                                                        | 3.37        | transcription                           | nucleus                          | DNA binding,zinc ion binding                             |
| 54796       | AA843242                 | BNC2        | basonuclin 2                                                                                                   | 5.83        | transcription                           | nucleus                          | zinc ion binding                                         |
| 167681      | AL574912                 | PRSS35      | protease, serine, 35                                                                                           | 3.06        | proteolysis                             | extracellular region             | serine-type endopeptidase activity                       |
| 606495      | AI928392                 | CYB5RL      | cytochrome b5 reductase-like                                                                                   | 8.47        | oxidation reduction                     |                                  | electron carrier activity,                               |
| 11228       | BF979984                 | RASSF8      | Ras association (RalGDS/AF-6) domain family (N-terminal) member 8                                              | 0.11        | signal transduction                     |                                  |                                                          |
| 84448       | AI912773                 | ABLIM2      | actin binding LIM protein family, member 2                                                                     | 0.23        | cytoskeleton organization,transcription | cytoplasm,actin cytoskeleton     | actin binding,zinc ion binding                           |
| 4915        | BE858459                 | NTRK2       | neurotrophic tyrosine kinase, receptor, type 2                                                                 | 0.10        | vasculogenesis, phosphorylation         | cytosol,plasma membrane          | nucleotide binding,,protein tyrosine kinase activity     |
| 124975      | AI697028                 | GGT6        | gamma-glutamyltransferase 6                                                                                    | 8.79        | glutathione biosynthetic process        | membrane                         | gamma-glutamyltransferase activity                       |
| 5581        | AA626142                 | PRKCE       | Protein kinase C, epsilon                                                                                      | 3.85        | phosphorylation, apoptosis              | membrane fraction                | nucleotide binding,protein kinase C activity             |
| 8663        | AI377875                 | EIF3C       | eukaryotic translation initiation factor 3                                                                     | 5.75        | translation                             | cytoplasm                        | translation initiation factor activity                   |

| Entrez Gene    | Representative Public ID | Gene Symbol      | Gene Title                                                                                                         | Fold change | Gene Ontology Biological Process              | Gene Ontology Cellular Component        | Gene Ontology Molecular Function                    |
|----------------|--------------------------|------------------|--------------------------------------------------------------------------------------------------------------------|-------------|-----------------------------------------------|-----------------------------------------|-----------------------------------------------------|
| 79987          | BF436117                 | SVEP1            | sushi, von Willebrand factor type A, EGF and pentraxin domain containing 1                                         | 0.24        | cell adhesion                                 | extracellular region,cytoplasm,membrane | chromatin binding,calcium ion binding               |
| 55973          | BF433093                 | BCAP29           | B-cell receptor-associated protein 29                                                                              | 6.52        | transport,apoptosis                           | endoplasmic reticulum                   | receptor activity                                   |
| 144453         | AA878383                 | BEST3            | bestrophin 3                                                                                                       | 3.80        | ion transport                                 | plasma membrane                         | ion channel activity                                |
| 55251          | BF509219                 | PCMTD2           | protein-L-isoaspartate (D-aspartate) O-methyltransferase domain containing 2                                       | 0.23        | transcription                                 | nucleus                                 | transcription factor activity                       |
| 152110         | AI652681                 | NEK10            | NIMA (never in mitosis gene a)-related kinase 10                                                                   | 6.56        | phosphorylation                               |                                         | protein serine/threonine kinase activityATP binding |
| 158880         | AI341140                 | USP51            | ubiquitin specific peptidase 51                                                                                    | 3.33        | ubiquitin-dependent protein catabolic process | nucleus,cytoplasm                       | ubiquitin thiolesterase activity                    |
| 6428           | AA702507                 | SFRS3            | Splicing factor, arginine/serine-rich 3                                                                            | 4.89        | nuclear mRNA splicing                         | nucleus                                 | RNA binding                                         |
| 57092 / 729298 | BE465316                 | LOC729298 / PCNP | similar to PEST proteolytic signal containing nuclear protein / PEST proteolytic signal containing nuclear protein | 0.14        | cell cycle,protein ubiquitination             | nucleus                                 | protein binding                                     |
| 55186          | AW514168                 | SLC25A36         | Solute carrier family 25, member 36                                                                                | 3.83        | transport                                     | mitochondrion                           | transporter activity                                |
| 117584         | AV660759                 | RFFL             | Ring finger and FYVE-like domain containing 1                                                                      | 5.36        | protein transport,apoptosis                   | cytoplasm,membrane                      | zinc ion binding,ligase activity                    |
| 195814         | AI440266                 | SDR16C5          | short chain dehydrogenase/reductase family 16C, member 5                                                           | 0.18        | oxidation reduction                           | membrane                                | catalytic activity                                  |

| Entrez Gene | Representative Public ID | Gene Symbol | Gene Title                                                   | Fold change | Gene Ontology Biological Process             | Gene Ontology Cellular Component        | Gene Ontology Molecular Function |
|-------------|--------------------------|-------------|--------------------------------------------------------------|-------------|----------------------------------------------|-----------------------------------------|----------------------------------|
| 7170        | AV713323                 | TPM3        | tropomyosin 3                                                | 0.24        | cell motion,regulation of muscle contraction | nucleus,cytoplasm                       | actin binding                    |
| 390963      | AI651641                 | ZNF818P     | zinc finger protein 818 pseudogene                           | 4.39        | transcription                                | nucleus                                 | DNA binding,zinc ion binding     |
| 84253       | AI698,1                  | GARNL3      | GTPase activating Rap/RanGAP domain-like 3                   | 0.18        | small GTPase mediated signal transduction    | intracellular                           | small GTPase regulator activity  |
| 163081      | BF061829                 | ZNF567      | zinc finger protein 567                                      | 0.30        | transcription                                | nucleus                                 | DNA binding,zinc ion binding     |
| 149111      | AI142850                 | CNIH3       | Cornichon homolog 3 (Drosophila)                             | 0.16        | intracellular signaling cascade              | membrane                                |                                  |
| 80264       | AW954842                 | ZNF430      | zinc finger protein 430                                      | 3.52        | transcription                                | nucleus                                 | DNA binding,zinc ion binding     |
| 8526        | AI589594                 | DGKE        | diacylglycerol kinase, epsilon 64kDa                         | 0.33        | activation of protein kinase C activity      | membrane                                | diacylglycerol kinase activity   |
| 83852       | AW977837                 | SETDB2      | SET domain, bifurcated 2                                     | 4.86        | chromatin modification                       | nucleus                                 | methyltransferase activity       |
| 22862       | AA452239                 | FNDC3A      | Fibronectin type III domain containing 3A                    | 0.29        | spermatid development                        | acrosomal vesicle,endoplasmic reticulum |                                  |
| 388585      | AW079166                 | HES5        | hairy and enhancer of split 5 (Drosophila)                   | 0.24        | transcription                                | nucleus                                 | transcription regulator activity |
| 147947      | BE966038                 | ZNF542      | zinc finger protein 542                                      | 3.94        | transcription                                | nucleus                                 | DNA binding,zinc ion binding     |
| 7562        | BF223715                 | ZNF708      | zinc finger protein 708                                      | 6.07        | transcription                                | nucleus                                 | DNA binding,zinc ion binding     |
| 6129        | AI984074                 | RPL7        | ribosomal protein L7                                         | 5.25        | rRNA processing                              | ribosome                                | DNA binding,RNA binding          |
| 79685       | AW058652                 | SAP30L      | SAP30-like                                                   | 0.13        | transcription                                | nucleus                                 |                                  |
| 5675        | AI394154                 | PSG6        | pregnancy specific beta-1-glycoprotein 6 major               | 14.84       | pregnancy                                    | extracellular region                    |                                  |
| 3116        | BF057731                 | HLA-DPB2    | histocompatibility complex, class II, DP beta 2 (pseudogene) | 0.02        | immune response                              | MHC class II protein complex            |                                  |
| 8825        | BF062244                 | LIN7A       | lin-7 homolog A (C. elegans)                                 | 3.30        | protein complex assembly                     | membrane                                | protein binding                  |

| Entrez Gene | Representative Public ID | Gene Symbol | Gene Title                                                                                          | Fold change | Gene Ontology Biological Process | Gene Ontology Cellular Component        | Gene Ontology Molecular Function               |
|-------------|--------------------------|-------------|-----------------------------------------------------------------------------------------------------|-------------|----------------------------------|-----------------------------------------|------------------------------------------------|
| 134288      | AI927971                 | TMEM174     | transmembrane protein 174                                                                           | 0.13        |                                  | membrane                                |                                                |
| 1773        | AI692769                 | DNASE1      | deoxyribonuclease I                                                                                 | 6.04        | DNA catabolic process,apoptosis  | extracellular region,nucleus            | actin binding,nuclease activity                |
| 6095        | AW663525                 | RORA        | RAR-related orphan receptor A                                                                       | 4.12        | transcription                    | nucleus                                 | transcription factor activity                  |
| 8925        | AW591969                 | HERC1       | hect (homologous to the E6-AP (UBE3A) carboxyl terminus) domain and RCC1 (CHC1)-like domain (RLD) 1 | 17.14       | protein modification process     | Golgi apparatus                         | ARF guanyl-nucleotide exchange factor activity |
| 284716      | R44984                   | RIMKLA      | ribosomal modification protein rimK-like family member A                                            | 0.15        | protein modification process     |                                         | ATP binding,manganese ion binding              |
| 55211       | AV756594                 | DPPA4       | developmental pluripotency associated 4                                                             | 13.93       |                                  | nucleus                                 | protein binding                                |
| 229         | AV650426                 | ALDOB       | Aldolase B, fructose-bisphosphate                                                                   | 0.11        | NADH oxidation,metabolic process | nucleolus,microtubule organizing center | fructose-bisphosphate aldolase activity        |
| 162967      | AI025436                 | ZNF320      | zinc finger protein 320                                                                             | 5.32        | transcription                    | nucleus                                 | DNA binding,zinc ion binding                   |
| 23504       | AA889573                 | RIMBP2      | RIMS binding protein 2                                                                              | 18.73       |                                  | membrane                                |                                                |
| 22978       | AA677629                 | NT5C2       | 5'-nucleotidase, cytosolic II                                                                       | 6.24        | nucleotide metabolic process     | cytosol                                 | 5'-nucleotidase activity                       |
| 55183       | BF666241                 | RIF1        | RAP1 interacting factor homolog (yeast)                                                             | 3.05        | DNA damage stimulus              | chromosome                              | binding                                        |
| 55332       | AA724995                 | DRAM        | Damage-regulated autophagy modulator                                                                | 5.73        | autophagy,apoptosis              | lysosome                                |                                                |
| 3417        | AA825652                 | IDH1        | Isocitrate dehydrogenase 1 (NADP+), soluble                                                         | 7.33        | glyoxylate cycle                 | cytoplasm                               | isocitrate dehydrogenase (NADP+) activity      |
| 124411      | AI741586                 | ZNF720      | zinc finger protein 720                                                                             | 19.42       | regulation of transcription      | intracellular                           | nucleic acid binding,zinc ion binding          |
| 440552      | AI535835                 | LOC440552   | OK/SW-cl.16                                                                                         | 3.17        | proton transport                 | mitochondrial                           | nitrite reductase [NAD(P)H] activity           |

| Entrez Gene     | Representative Public ID | Gene Symbol         | Gene Title                                      | Fold change | Gene Ontology Biological Process            | Gene Ontology Cellular Component    | Gene Ontology Molecular Function                                                                |
|-----------------|--------------------------|---------------------|-------------------------------------------------|-------------|---------------------------------------------|-------------------------------------|-------------------------------------------------------------------------------------------------|
| 7572            | AA749167                 | ZNF24               | Zinc finger protein 24                          | 11.74       | transcription                               | nucleus                             | transcription factor activity                                                                   |
| 6711            | H29479                   | SPTBN1              | spectrin, beta, non-erythrocytic 1              | 0.23        | SMAD protein phosphorylation                | nucleus,cytoskeleton                | actin binding                                                                                   |
| 146540          | AI375066                 | ZNF785              | zinc finger protein 785                         | 8.90        | transcription                               | nucleus                             | DNA binding,zinc ion binding                                                                    |
| 2752            | AW665656                 | GLUL                | glutamate-ammonia ligase (glutamine synthetase) | 0.20        | glutamine biosynthetic process              | mitochondrion,Golgi apparatus       | glutamate-ammonia ligase activity                                                               |
| 162966          | AI620827                 | ZNF6,               | zinc finger protein 6,                          | 13.73       | transcription                               | nucleus                             | DNA binding,zinc ion binding                                                                    |
| 57798           | H48897                   | GATAD1              | GATA zinc finger domain containing 1            | 11.47       | ,regulation of transcription, DNA-dependent | ,nucleus,nucleus                    | ,transcription factor activity,zinc ion binding,sequence-specific DNA binding,metal ion binding |
| 147923          | AI061288                 | ZNF420              | zinc finger protein 420                         | 3.12        | transcription                               | nucleus                             | DNA binding,zinc ion binding                                                                    |
| 115196          | AI924872                 | ZNF554              | zinc finger protein 554                         | 0.22        | transcription                               | nucleus                             | heme oxygenase (decyclizing) activity                                                           |
| 283481          | AI042341                 | LOC283481           | hypothetical protein LOC283481                  | 0.07        |                                             |                                     |                                                                                                 |
| 10135           | AA873350                 | NAMPT               | Nicotinamide phosphoribosyltransferase          | 3.69        | signal transduction                         | cytoplasm                           | transferase activity                                                                            |
| 80216           | AA521086                 | ALPK1               | alpha-kinase 1                                  | 4.10        | phosphorylation                             |                                     | ,protein serine/threonine kinase activity                                                       |
| 257194          | AA115106                 | NEGR1               | neuronal growth regulator 1                     | 3.33        | cell adhesion                               | membrane                            | protein binding                                                                                 |
| 127254          | AI674786                 | C1orf173            | chromosome 1 open reading frame 173             | 13.71       |                                             |                                     |                                                                                                 |
| 1,129289 / 5218 | AI026778                 | LOC1,129289 / PFTK1 | similar to rCG41102 / PFTAIRE protein kinase 1  | 5.86        | phosphorylation                             | nucleus                             | protein serine/threonine kinase activity                                                        |
| 124790          | N93663                   | HEXIM2              | Hexamethylene bis-acetamide inducible 2         | 0.33        | transcription                               | nucleus,cytoplasm                   | cyclin-dependent protein kinase inhibitor activity                                              |
| 201625          | AI,5163                  | DNAH12              | dynein, axonemal, heavy chain 12                | 0.20        | microtubule-based movement                  | axonemal dynein complex,microtubule | microtubule motor activity                                                                      |



| Entrez Gene | Representative Public ID | Gene Symbol | Gene Title                                                                               | Fold change | Gene Ontology Biological Process                  | Gene Ontology Cellular Component               | Gene Ontology Molecular Function                                   |
|-------------|--------------------------|-------------|------------------------------------------------------------------------------------------|-------------|---------------------------------------------------|------------------------------------------------|--------------------------------------------------------------------|
| 339965      | AA927934                 | CCDC158     | coiled-coil domain containing 158                                                        | 19.87       |                                                   |                                                |                                                                    |
| 23,2        | AL043148                 | DAAM1       | dishevelled associated activator of morphogenesis 1                                      | 0.15        | actin cytoskeleton organization                   | cytoplasm                                      | actin binding,Rho GTPase binding                                   |
| 55622       | AI129850                 | TTC27       | Tetratricopeptide repeat domain 27                                                       | 4.86        |                                                   |                                                | protein binding                                                    |
| 152831      | AI668605                 | KLB         | klotho beta                                                                              | 0.22        | carbohydrate metabolic process                    | membrane                                       | catalytic activity                                                 |
| 375         | AW139048                 | ARF1        | ADP-ribosylation factor 1                                                                | 0.22        | Golgi to ER transport                             | ,Golgi apparatus,cytosol                       | GTPase activity                                                    |
| 56479       | BF5138,                  | KCNQ5       | potassium voltage-gated channel, KQT-like subfamily, member 5                            | 4.04        | potassium ion transport                           | voltage-gated potassium channel complex        | inward rectifier potassium channel activity                        |
| 6233        | AW013893                 | RPS27A      | ribosomal protein S27a                                                                   | 3.12        | translational elongation                          | cytosol,ribosome                               | structural constituent of ribosome,zinc ion binding                |
| 80854       | AI985614                 | SETD7       | SET domain containing (lysine methyltransferase) 7                                       | 0.31        | transcription                                     | chromosome                                     | methyltransferase activity                                         |
| 5229        | AI432340                 | PGGT1B      | geranylgeranyltransferase type I, beta subunit                                           | 9.69        | protein amino acid geranylgeranylation            | CAAX-protein geranylgeranyltransferase complex | CAAX-protein geranylgeranyltransferase activity                    |
| 4881        | X15357                   | NPR1        | natriuretic peptide receptor A/guanylate cyclase A (atrionatriuretic peptide receptor A) | 0.22        | cGMP biosynthetic process,phosphorylation         | membrane                                       | guanylate cyclase activity                                         |
| Entrez Gene | Representative Public ID | Gene Symbol | Gene Title                                                                               | Fold change | Gene Ontology Biological Process                  | Gene Ontology Cellular Component               | Gene Ontology Molecular Function                                   |
| 203102      | NM_145004                | ADAM32      | ADAM metallopeptidase domain 32                                                          | 0.10        | proteolysis , integrin-mediated signaling pathway | extracellular region , membrane                | metalloendopeptidase activity,peptidase activity, zinc ion binding |
| 85509       | NM_145208                | MBD3L1      | methyl-CpG binding domain protein 3-like 1                                               | 0.20        | transcription                                     | nucleus                                        |                                                                    |
| 85509       | NM_145208                | MBD3L1      | methyl-CpG binding domain protein 3-like 1                                               | 0.20        | transcription                                     | nucleus                                        |                                                                    |

| <b>Entrez Gene</b> | <b>Representative Public ID</b> | <b>Gene Symbol</b> | <b>Gene Title</b>                 | <b>Fold change</b> | <b>Gene Ontology Biological Process</b> | <b>Gene Ontology Cellular Component</b>      | <b>Gene Ontology Molecular Function</b>   |
|--------------------|---------------------------------|--------------------|-----------------------------------|--------------------|-----------------------------------------|----------------------------------------------|-------------------------------------------|
| 114836             | NM_052931                       | SLAMF6             | SLAM family member 6              | 3.67               |                                         | membrane                                     | receptor activity                         |
| 157753             | BC030710                        | TMEM74             | transmembrane protein 74          | 0.33               |                                         | membrane                                     |                                           |
| 253559             | NM_153184                       | CADM2              | cell adhesion molecule 2          | 5.60               |                                         | membrane                                     |                                           |
| 147687             | NM_152475                       | ZNF417             | zinc finger protein 417           | 0.04               | transcription                           | nucleus                                      | DNA binding,zinc ion binding              |
| 22858              | NM_173041                       | ICK                | intestinal cell (MAK-like) kinase | 0.10               | protein amino acid phosphorylation      | nucleus,cytoplasm,membrane-bounded organelle | nucleotide binding, magnesium ion binding |
